# Supplementary material for: Transcriptional milestones in Dictyostelium development
Source: HighWire-hosted journal article supplement (doi:10.1101/gr.275496.121), 2021-06-28
Supplement: Supplemental_File_S7_JDedit.xlsx [file Supplemental_File_S7_JDedit.xlsx]

## Sheet: Milestone genes
Supplemental_File_S7: Milestones, Regulons and disaggregation gene lists
ddb_g	genename	noagg_ripple	ripple_lag	lag_tag	tag_tip	tip_slug	slug_Mhat	Mhat_cul	cul_FB
DDB_G0289537	DDB_G0289537	noagg_ripple_down		lag_tag_up
DDB_G0274669	DDB_G0274669	noagg_ripple_down					slug_Mhat_up
DDB_G0275599	DDB_G0275599	noagg_ripple_down					slug_Mhat_up
DDB_G0278283	fol1	noagg_ripple_down					slug_Mhat_up
DDB_G0278571	DDB_G0278571	noagg_ripple_down					slug_Mhat_up
DDB_G0279275	DDB_G0279275	noagg_ripple_down					slug_Mhat_up
DDB_G0283991	DDB_G0283991	noagg_ripple_down					slug_Mhat_up
DDB_G0287519	DDB_G0287519	noagg_ripple_down					slug_Mhat_up
DDB_G0267848	DDB_G0267848	noagg_ripple_down						Mhat_cul_up
DDB_G0271740	DDB_G0271740	noagg_ripple_down							cul_FB_up
DDB_G0273211	aslD-1	noagg_ripple_down							cul_FB_up
DDB_G0278115	netD	noagg_ripple_down							cul_FB_up
DDB_G0284631	DDB_G0284631	noagg_ripple_down							cul_FB_up
DDB_G0267354	DDB_G0267354_TE	noagg_ripple_down
DDB_G0267466	cupA	noagg_ripple_down
DDB_G0267486	DDB_G0267486	noagg_ripple_down
DDB_G0267592	DDB_G0267592	noagg_ripple_down
DDB_G0267726	uduA2	noagg_ripple_down
DDB_G0267728	uduA3	noagg_ripple_down
DDB_G0267756	DDB_G0267756	noagg_ripple_down
DDB_G0267766	gfm2	noagg_ripple_down
DDB_G0267768	DDB_G0267768	noagg_ripple_down
DDB_G0267908	DDB_G0267908	noagg_ripple_down
DDB_G0267928	tmem144B	noagg_ripple_down
DDB_G0267930	DDB_G0267930	noagg_ripple_down
DDB_G0268138	DDB_G0268138	noagg_ripple_down
DDB_G0268192	DDB_G0268192	noagg_ripple_down
DDB_G0268332	uduA1	noagg_ripple_down
DDB_G0268344	DDB_G0268344	noagg_ripple_down
DDB_G0268600	uduB	noagg_ripple_down
DDB_G0268828	DDB_G0268828	noagg_ripple_down
DDB_G0268848	DDB_G0268848	noagg_ripple_down
DDB_G0268890	aplJ	noagg_ripple_down
DDB_G0268948	DDB_G0268948	noagg_ripple_down
DDB_G0269226	cas1	noagg_ripple_down
DDB_G0269248	cf45-1	noagg_ripple_down
DDB_G0269270	DDB_G0269270	noagg_ripple_down
DDB_G0269322	DDB_G0269322	noagg_ripple_down
DDB_G0269376	DDB_G0269376	noagg_ripple_down
DDB_G0269394	mcfE	noagg_ripple_down
DDB_G0269616	aplG	noagg_ripple_down
DDB_G0269628	DDB_G0269628	noagg_ripple_down
DDB_G0269738	desA	noagg_ripple_down
DDB_G0269790	gaa	noagg_ripple_down
DDB_G0269850	DDB_G0269850	noagg_ripple_down
DDB_G0270030	DDB_G0270030	noagg_ripple_down
DDB_G0270032	DDB_G0270032	noagg_ripple_down
DDB_G0270070	DDB_G0270070	noagg_ripple_down
DDB_G0270124	rasX	noagg_ripple_down
DDB_G0270132	DDB_G0270132	noagg_ripple_down
DDB_G0270212	DDB_G0270212	noagg_ripple_down
DDB_G0270214	DD7-1	noagg_ripple_down
DDB_G0270302	DDB_G0270302	noagg_ripple_down
DDB_G0270308	DDB_G0270308	noagg_ripple_down
DDB_G0270422	slc4	noagg_ripple_down
DDB_G0270482	gfm1	noagg_ripple_down
DDB_G0270572	pks2	noagg_ripple_down
DDB_G0270946	DDB_G0270946	noagg_ripple_down
DDB_G0271138	abcA8	noagg_ripple_down
DDB_G0271140	abcA7	noagg_ripple_down
DDB_G0271242	DDB_G0271242	noagg_ripple_down
DDB_G0271336	DDB_G0271336	noagg_ripple_down
DDB_G0271548	DDB_G0271548	noagg_ripple_down
DDB_G0271692	comC	noagg_ripple_down
DDB_G0271720	DDB_G0271720	noagg_ripple_down
DDB_G0271902	pscA	noagg_ripple_down
DDB_G0272238	DDB_G0272238	noagg_ripple_down
DDB_G0272242	cupI	noagg_ripple_down
DDB_G0272404	DDB_G0272404	noagg_ripple_down
DDB_G0272632	DDB_G0272632	noagg_ripple_down
DDB_G0272636	DDB_G0272636	noagg_ripple_down
DDB_G0272781	pmmB	noagg_ripple_down
DDB_G0272783	rliA	noagg_ripple_down
DDB_G0272785	DDB_G0272785	noagg_ripple_down
DDB_G0272889	surf1-1	noagg_ripple_down
DDB_G0273065	dscC-1	noagg_ripple_down
DDB_G0273105	scdB-1	noagg_ripple_down
DDB_G0273257	comF-1	noagg_ripple_down
DDB_G0273291	ddo-2	noagg_ripple_down
DDB_G0273331	DDB_G0273331	noagg_ripple_down
DDB_G0273405	DDB_G0273405_ps	noagg_ripple_down
DDB_G0273487	DDB_G0273487	noagg_ripple_down
DDB_G0274143	DDB_G0274143	noagg_ripple_down
DDB_G0274181	DDB_G0274181	noagg_ripple_down
DDB_G0274223	DDB_G0274223	noagg_ripple_down
DDB_G0274231	DDB_G0274231	noagg_ripple_down
DDB_G0274257	fhit	noagg_ripple_down
DDB_G0274465	DDB_G0274465	noagg_ripple_down
DDB_G0274495	DDB_G0274495	noagg_ripple_down
DDB_G0274727	act19	noagg_ripple_down
DDB_G0274773	fslH	noagg_ripple_down
DDB_G0274925	DDB_G0274925_ps	noagg_ripple_down
DDB_G0275069	pks16	noagg_ripple_down
DDB_G0275107	DDB_G0275107	noagg_ripple_down
DDB_G0275111	DDB_G0275111	noagg_ripple_down
DDB_G0275125	plbF	noagg_ripple_down
DDB_G0275501	omt6	noagg_ripple_down
DDB_G0275557	DDB_G0275557	noagg_ripple_down
DDB_G0275693	tpp1C	noagg_ripple_down
DDB_G0275713	DDB_G0275713	noagg_ripple_down
DDB_G0275721	DDB_G0275721	noagg_ripple_down
DDB_G0275799	DDB_G0275799	noagg_ripple_down
DDB_G0275831	DDB_G0275831	noagg_ripple_down
DDB_G0276067	ddcB	noagg_ripple_down
DDB_G0276115	dph5	noagg_ripple_down
DDB_G0276237	DDB_G0276237	noagg_ripple_down
DDB_G0276271	DDB_G0276271	noagg_ripple_down
DDB_G0276299	agnA	noagg_ripple_down
DDB_G0276331	pyr4	noagg_ripple_down
DDB_G0276479	ctnC	noagg_ripple_down
DDB_G0276513	DDB_G0276513	noagg_ripple_down
DDB_G0276607	hspG3	noagg_ripple_down
DDB_G0276839	DDB_G0276839	noagg_ripple_down
DDB_G0276921	DDB_G0276921	noagg_ripple_down
DDB_G0276973	nramp1	noagg_ripple_down
DDB_G0277031	DDB_G0277031	noagg_ripple_down
DDB_G0277103	DDB_G0277103	noagg_ripple_down
DDB_G0277203	DDB_G0277203	noagg_ripple_down
DDB_G0277515	DDB_G0277515	noagg_ripple_down
DDB_G0277557	DDB_G0277557	noagg_ripple_down
DDB_G0277707	DDB_G0277707	noagg_ripple_down
DDB_G0277745	DDB_G0277745	noagg_ripple_down
DDB_G0277839	cxgS	noagg_ripple_down
DDB_G0277983	tbcB	noagg_ripple_down
DDB_G0278159	pssA	noagg_ripple_down
DDB_G0278243	rliB	noagg_ripple_down
DDB_G0278265	DDB_G0278265	noagg_ripple_down
DDB_G0278267	DDB_G0278267	noagg_ripple_down
DDB_G0278341	DDB_G0278341	noagg_ripple_down
DDB_G0278345	acly	noagg_ripple_down
DDB_G0278503	DDB_G0278503	noagg_ripple_down
DDB_G0278623	DDB_G0278623	noagg_ripple_down
DDB_G0278721	cprD	noagg_ripple_down
DDB_G0278789	DDB_G0278789	noagg_ripple_down
DDB_G0278875	dduD	noagg_ripple_down
DDB_G0279095	ptsA	noagg_ripple_down
DDB_G0279185	cprF	noagg_ripple_down
DDB_G0279221	DDB_G0279221	noagg_ripple_down
DDB_G0279497	DDB_G0279497	noagg_ripple_down
DDB_G0279551	DDB_G0279551	noagg_ripple_down
DDB_G0279591	glnA3	noagg_ripple_down
DDB_G0279707	iliP	noagg_ripple_down
DDB_G0279715	mtyrS	noagg_ripple_down
DDB_G0279851	DDB_G0279851	noagg_ripple_down
DDB_G0279871	areA	noagg_ripple_down
DDB_G0279921	gp130	noagg_ripple_down
DDB_G0280003	DDB_G0280003	noagg_ripple_down
DDB_G0280105	DDB_G0280105	noagg_ripple_down
DDB_G0280317	DDB_G0280317	noagg_ripple_down
DDB_G0280335	DDB_G0280335	noagg_ripple_down
DDB_G0280401	cypD	noagg_ripple_down
DDB_G0280483	fsjA	noagg_ripple_down
DDB_G0280485	jcdH	noagg_ripple_down
DDB_G0280545	act7	noagg_ripple_down
DDB_G0280767	DDB_G0280767	noagg_ripple_down
DDB_G0280819	aoxA	noagg_ripple_down
DDB_G0281059	DDB_G0281059	noagg_ripple_down
DDB_G0281071	serA	noagg_ripple_down
DDB_G0281239	impa1	noagg_ripple_down
DDB_G0281495	DDB_G0281495	noagg_ripple_down
DDB_G0281549	coxA	noagg_ripple_down
DDB_G0281823	tpp1F	noagg_ripple_down
DDB_G0281837	DDB_G0281837	noagg_ripple_down
DDB_G0282061	DDB_G0282061	noagg_ripple_down
DDB_G0282137	DDB_G0282137	noagg_ripple_down
DDB_G0282153	aplH	noagg_ripple_down
DDB_G0282467	DDB_G0282467	noagg_ripple_down
DDB_G0282577	DDB_G0282577	noagg_ripple_down
DDB_G0282673	DDB_G0282673	noagg_ripple_down
DDB_G0282761	DDB_G0282761	noagg_ripple_down
DDB_G0283019	DDB_G0283019	noagg_ripple_down
DDB_G0283097	DDB_G0283097	noagg_ripple_down
DDB_G0283175	prfA	noagg_ripple_down
DDB_G0283271	DDB_G0283271	noagg_ripple_down
DDB_G0283291	DDB_G0283291	noagg_ripple_down
DDB_G0283309	DDB_G0283309	noagg_ripple_down
DDB_G0283653	DDB_G0283653	noagg_ripple_down
DDB_G0283765	hgd	noagg_ripple_down
DDB_G0283915	DDB_G0283915	noagg_ripple_down
DDB_G0283921	ctsB	noagg_ripple_down
DDB_G0284145	DDB_G0284145	noagg_ripple_down
DDB_G0284203	kynu	noagg_ripple_down
DDB_G0284401	DDB_G0284401	noagg_ripple_down
DDB_G0284429	DDB_G0284429	noagg_ripple_down
DDB_G0284547	DDB_G0284547	noagg_ripple_down
DDB_G0284549	dduF	noagg_ripple_down
DDB_G0284629	DDB_G0284629	noagg_ripple_down
DDB_G0284671	DDB_G0284671	noagg_ripple_down
DDB_G0284811	DDB_G0284811	noagg_ripple_down
DDB_G0285003	aifC	noagg_ripple_down
DDB_G0285109	DDB_G0285109	noagg_ripple_down
DDB_G0285351	DDB_G0285351	noagg_ripple_down
DDB_G0285575	alkB	noagg_ripple_down
DDB_G0285591	cmbl	noagg_ripple_down
DDB_G0285595	DDB_G0285595	noagg_ripple_down
DDB_G0285673	DDB_G0285673	noagg_ripple_down
DDB_G0286385	padA	noagg_ripple_down
DDB_G0286399	tsfm	noagg_ripple_down
DDB_G0286427	uox	noagg_ripple_down
DDB_G0286445	DDB_G0286445	noagg_ripple_down
DDB_G0286495	itpa	noagg_ripple_down
DDB_G0286637	DDB_G0286637	noagg_ripple_down
DDB_G0286651	aplB	noagg_ripple_down
DDB_G0286653	aplO	noagg_ripple_down
DDB_G0286761	DDB_G0286761	noagg_ripple_down
DDB_G0286843	gtaQ	noagg_ripple_down
DDB_G0286845	DDB_G0286845	noagg_ripple_down
DDB_G0287003	DDB_G0287003	noagg_ripple_down
DDB_G0287025	DDB_G0287025	noagg_ripple_down
DDB_G0287215	DDB_G0287215	noagg_ripple_down
DDB_G0287305	DDB_G0287305	noagg_ripple_down
DDB_G0287427	DDB_G0287427	noagg_ripple_down
DDB_G0287513	jcdG	noagg_ripple_down
DDB_G0287587	smlA	noagg_ripple_down
DDB_G0287589	abcC14	noagg_ripple_down
DDB_G0287889	DDB_G0287889	noagg_ripple_down
DDB_G0287997	ptcD	noagg_ripple_down
DDB_G0288011	DDB_G0288011	noagg_ripple_down
DDB_G0288131	cmbB	noagg_ripple_down
DDB_G0288317	DDB_G0288317	noagg_ripple_down
DDB_G0288387	accA	noagg_ripple_down
DDB_G0288481	gchA	noagg_ripple_down
DDB_G0288493	DDB_G0288493	noagg_ripple_down
DDB_G0288507	nat3	noagg_ripple_down
DDB_G0288579	DDB_G0288579	noagg_ripple_down
DDB_G0288591	DDB_G0288591	noagg_ripple_down
DDB_G0288649	ponL	noagg_ripple_down
DDB_G0288715	gadB	noagg_ripple_down
DDB_G0288807	ppt2	noagg_ripple_down
DDB_G0288893	hemF	noagg_ripple_down
DDB_G0288989	nipsnap	noagg_ripple_down
DDB_G0289127	DDB_G0289127	noagg_ripple_down
DDB_G0289265	DDB_G0289265	noagg_ripple_down
DDB_G0289283	cupC	noagg_ripple_down
DDB_G0289311	DDB_G0289311	noagg_ripple_down
DDB_G0289349	DDB_G0289349	noagg_ripple_down
DDB_G0289519	DDB_G0289519	noagg_ripple_down
DDB_G0289521	srsA	noagg_ripple_down
DDB_G0289575	DDB_G0289575	noagg_ripple_down
DDB_G0289629	DDB_G0289629	noagg_ripple_down
DDB_G0289647	DDB_G0289647_ps	noagg_ripple_down
DDB_G0289813	cupF	noagg_ripple_down
DDB_G0289921	DDB_G0289921	noagg_ripple_down
DDB_G0290139	DDB_G0290139	noagg_ripple_down
DDB_G0290411	DDB_G0290411	noagg_ripple_down
DDB_G0290441	DDB_G0290441	noagg_ripple_down
DDB_G0290449	DDB_G0290449	noagg_ripple_down
DDB_G0290535	DDB_G0290535	noagg_ripple_down
DDB_G0290659	sdrA	noagg_ripple_down
DDB_G0290839	DDB_G0290839	noagg_ripple_down
DDB_G0290863	DDB_G0290863	noagg_ripple_down
DDB_G0290975	DDB_G0290975	noagg_ripple_down
DDB_G0291121	cinB	noagg_ripple_down
DDB_G0291301	DDB_G0291301	noagg_ripple_down
DDB_G0291314	DDB_G0291314	noagg_ripple_down
DDB_G0291332	DDB_G0291332	noagg_ripple_down
DDB_G0291336	DDB_G0291336	noagg_ripple_down
DDB_G0291346	mleuS	noagg_ripple_down
DDB_G0291410	DDB_G0291410	noagg_ripple_down
DDB_G0291482	gloB2	noagg_ripple_down
DDB_G0291856	gerD	noagg_ripple_down
DDB_G0291908	DDB_G0291908	noagg_ripple_down
DDB_G0291912	DDB_G0291912	noagg_ripple_down
DDB_G0292012	DDB_G0292012	noagg_ripple_down
DDB_G0292080	DDB_G0292080	noagg_ripple_down
DDB_G0292104	tkrA	noagg_ripple_down
DDB_G0292132	DDB_G0292132	noagg_ripple_down
DDB_G0292236	DDB_G0292236	noagg_ripple_down
DDB_G0292250	sqrdl	noagg_ripple_down
DDB_G0292328	iliM	noagg_ripple_down
DDB_G0292378	fhbA	noagg_ripple_down
DDB_G0292380	fhbB	noagg_ripple_down
DDB_G0292424	DDB_G0292424	noagg_ripple_down
DDB_G0292636	DDB_G0292636	noagg_ripple_down
DDB_G0292978	DDB_G0292978	noagg_ripple_down
DDB_G0293366	DDB_G0293366	noagg_ripple_down
DDB_G0293370	DDB_G0293370	noagg_ripple_down
DDB_G0293394	pter	noagg_ripple_down
DDB_G0293428	DDB_G0293428	noagg_ripple_down
DDB_G0293460	DDB_G0293460	noagg_ripple_down
DDB_G0293536	cupD	noagg_ripple_down
DDB_G0293556	mcfG	noagg_ripple_down
DDB_G0293566	DDB_G0293566	noagg_ripple_down
DDB_G0293730	DDB_G0293730	noagg_ripple_down
DDB_G0293850	alrA	noagg_ripple_down
DDB_G0293912	pks45	noagg_ripple_down
DDB_G0293956	DDB_G0293956	noagg_ripple_down
DDB_G0294589	DDB_G0294589	noagg_ripple_down
DDB_G0294597	DDB_G0294597	noagg_ripple_down
DDB_G0295739	DDB_G0295739	noagg_ripple_down
DDB_G0295779	DDB_G0295779	noagg_ripple_down
DDB_G0295807	DDB_G0295807	noagg_ripple_down
DDB_G0349375	DDB_G0349375	noagg_ripple_down
DDB_G0349487	DDB_G0349487	noagg_ripple_down
DDB_G0267790	DDB_G0267790	noagg_ripple_up		lag_tag_down
DDB_G0276907	DDB_G0276907	noagg_ripple_up		lag_tag_down
DDB_G0284527	DDB_G0284527	noagg_ripple_up		lag_tag_down
DDB_G0288457	pks26	noagg_ripple_up		lag_tag_down
DDB_G0267654	tgrO2	noagg_ripple_up
DDB_G0267826	DDB_G0267826	noagg_ripple_up
DDB_G0267860	DDB_G0267860	noagg_ripple_up
DDB_G0267934	fnkB	noagg_ripple_up
DDB_G0268012	DDB_G0268012	noagg_ripple_up
DDB_G0268286	DDB_G0268286	noagg_ripple_up
DDB_G0268304	tgrO3	noagg_ripple_up
DDB_G0268318	DDB_G0268318	noagg_ripple_up
DDB_G0268362	DDB_G0268362	noagg_ripple_up
DDB_G0268374	dcd2B	noagg_ripple_up
DDB_G0268486	DDB_G0268486_ps	noagg_ripple_up
DDB_G0268490	tgrO1	noagg_ripple_up
DDB_G0268550	DDB_G0268550	noagg_ripple_up
DDB_G0268636	roco11	noagg_ripple_up
DDB_G0268754	DDB_G0268754	noagg_ripple_up
DDB_G0268830	DDB_G0268830	noagg_ripple_up
DDB_G0268832	DDB_G0268832	noagg_ripple_up
DDB_G0268850	DDB_G0268850	noagg_ripple_up
DDB_G0268854	gnt4	noagg_ripple_up
DDB_G0268874	DDB_G0268874	noagg_ripple_up
DDB_G0269010	DDB_G0269010	noagg_ripple_up
DDB_G0269018	DDB_G0269018	noagg_ripple_up
DDB_G0269222	gefB	noagg_ripple_up
DDB_G0269774	DDB_G0269774	noagg_ripple_up
DDB_G0269852	psaB_ps	noagg_ripple_up
DDB_G0270154	DDB_G0270154	noagg_ripple_up
DDB_G0270234	DDB_G0270234	noagg_ripple_up
DDB_G0270454	DDB_G0270454	noagg_ripple_up
DDB_G0270474	DDB_G0270474	noagg_ripple_up
DDB_G0270570	DDB_G0270570	noagg_ripple_up
DDB_G0270688	mpl2	noagg_ripple_up
DDB_G0271150	DDB_G0271150	noagg_ripple_up
DDB_G0271524	pks6	noagg_ripple_up
DDB_G0271806	rapgap3	noagg_ripple_up
DDB_G0271876	DDB_G0271876	noagg_ripple_up
DDB_G0271996	DDB_G0271996	noagg_ripple_up
DDB_G0272072	DDB_G0272072	noagg_ripple_up
DDB_G0272100	DDB_G0272100	noagg_ripple_up
DDB_G0272180	DDB_G0272180	noagg_ripple_up
DDB_G0272186	DDB_G0272186	noagg_ripple_up
DDB_G0272506	DDB_G0272506	noagg_ripple_up
DDB_G0272562	csbB	noagg_ripple_up
DDB_G0272586	DDB_G0272586	noagg_ripple_up
DDB_G0272650	DDB_G0272650	noagg_ripple_up
DDB_G0272742	DDB_G0272742	noagg_ripple_up
DDB_G0272809	DDB_G0272809	noagg_ripple_up
DDB_G0272833	csbA	noagg_ripple_up
DDB_G0272881	DDB_G0272881	noagg_ripple_up
DDB_G0272891	DDB_G0272891_ps	noagg_ripple_up
DDB_G0272919	DDB_G0272919	noagg_ripple_up
DDB_G0273051	drnA-1	noagg_ripple_up
DDB_G0273079	DDB_G0273079	noagg_ripple_up
DDB_G0273083	DDB_G0273083	noagg_ripple_up
DDB_G0273093	DDB_G0273093	noagg_ripple_up
DDB_G0273133	DDB_G0273133	noagg_ripple_up
DDB_G0273205	DDB_G0273205	noagg_ripple_up
DDB_G0274119	abcA5	noagg_ripple_up
DDB_G0274225	tgrA5	noagg_ripple_up
DDB_G0274243	gacF	noagg_ripple_up
DDB_G0274533	DDB_G0274533	noagg_ripple_up
DDB_G0274631	DDB_G0274631	noagg_ripple_up
DDB_G0274641	DDB_G0274641	noagg_ripple_up
DDB_G0274679	DDB_G0274679	noagg_ripple_up
DDB_G0274735	DDB_G0274735	noagg_ripple_up
DDB_G0274821	DDB_G0274821	noagg_ripple_up
DDB_G0274899	DDB_G0274899	noagg_ripple_up
DDB_G0275101	rab_ps2	noagg_ripple_up
DDB_G0275103	DDB_G0275103	noagg_ripple_up
DDB_G0275253	DDB_G0275253	noagg_ripple_up
DDB_G0275271	DDB_G0275271	noagg_ripple_up
DDB_G0275341	DDB_G0275341	noagg_ripple_up
DDB_G0275465	DDB_G0275465_ps	noagg_ripple_up
DDB_G0275487	DDB_G0275487	noagg_ripple_up
DDB_G0276041	tmem184B	noagg_ripple_up
DDB_G0276203	DDB_G0276203	noagg_ripple_up
DDB_G0276657	npcB	noagg_ripple_up
DDB_G0276801	DDB_G0276801	noagg_ripple_up
DDB_G0276835	glnA1	noagg_ripple_up
DDB_G0276989	DDB_G0276989	noagg_ripple_up
DDB_G0277325	DDB_G0277325	noagg_ripple_up
DDB_G0277395	DDB_G0277395	noagg_ripple_up
DDB_G0277427	DDB_G0277427	noagg_ripple_up
DDB_G0277627	tgrR2	noagg_ripple_up
DDB_G0277873	sqpA	noagg_ripple_up
DDB_G0278083	DDB_G0278083	noagg_ripple_up
DDB_G0278099	DDB_G0278099_ps	noagg_ripple_up
DDB_G0278217	rsmK	noagg_ripple_up
DDB_G0278325	DDB_G0278325	noagg_ripple_up
DDB_G0278489	DDB_G0278489	noagg_ripple_up
DDB_G0278611	DDB_G0278611	noagg_ripple_up
DDB_G0278671	DDB_G0278671	noagg_ripple_up
DDB_G0279051	DDB_G0279051	noagg_ripple_up
DDB_G0279203	DDB_G0279203	noagg_ripple_up
DDB_G0279241	DDB_G0279241	noagg_ripple_up
DDB_G0279243	DDB_G0279243	noagg_ripple_up
DDB_G0279473	DDB_G0279473	noagg_ripple_up
DDB_G0279751	DDB_G0279751	noagg_ripple_up
DDB_G0279783	DDB_G0279783	noagg_ripple_up
DDB_G0279799	cprB	noagg_ripple_up
DDB_G0279811	DDB_G0279811	noagg_ripple_up
DDB_G0280007	DDB_G0280007	noagg_ripple_up
DDB_G0280049	rdiB	noagg_ripple_up
DDB_G0280211	DDB_G0280211	noagg_ripple_up
DDB_G0280515	DDB_G0280515_ps	noagg_ripple_up
DDB_G0280643	DDB_G0280643	noagg_ripple_up
DDB_G0280677	DDB_G0280677_ps	noagg_ripple_up
DDB_G0280691	DDB_G0280691	noagg_ripple_up
DDB_G0280693	tgrB2	noagg_ripple_up
DDB_G0280751	DDB_G0280751	noagg_ripple_up
DDB_G0280817	DDB_G0280817	noagg_ripple_up
DDB_G0280861	DDB_G0280861_ps	noagg_ripple_up
DDB_G0280865	DDB_G0280865	noagg_ripple_up
DDB_G0280943	elmoD	noagg_ripple_up
DDB_G0280991	DDB_G0280991	noagg_ripple_up
DDB_G0281143	DDB_G0281143	noagg_ripple_up
DDB_G0281157	DDB_G0281157	noagg_ripple_up
DDB_G0281181	DDB_G0281181	noagg_ripple_up
DDB_G0281253	rsmB	noagg_ripple_up
DDB_G0281387	srfA	noagg_ripple_up
DDB_G0281401	DDB_G0281401	noagg_ripple_up
DDB_G0281407	tgrC5	noagg_ripple_up
DDB_G0281417	DDB_G0281417	noagg_ripple_up
DDB_G0281443	DDB_G0281443	noagg_ripple_up
DDB_G0281485	DDB_G0281485	noagg_ripple_up
DDB_G0281497	DDB_G0281497	noagg_ripple_up
DDB_G0281499	vinB	noagg_ripple_up
DDB_G0281537	DDB_G0281537	noagg_ripple_up
DDB_G0281857	DDB_G0281857	noagg_ripple_up
DDB_G0281929	DDB_G0281929	noagg_ripple_up
DDB_G0281993	DDB_G0281993	noagg_ripple_up
DDB_G0282069	slrA	noagg_ripple_up
DDB_G0282107	DDB_G0282107	noagg_ripple_up
DDB_G0282381	gefC	noagg_ripple_up
DDB_G0282487	DDB_G0282487	noagg_ripple_up
DDB_G0282491	DDB_G0282491	noagg_ripple_up
DDB_G0282629	DDB_G0282629	noagg_ripple_up
DDB_G0282769	cyp522A1	noagg_ripple_up
DDB_G0283263	migA	noagg_ripple_up
DDB_G0283337	DDB_G0283337	noagg_ripple_up
DDB_G0283429	DDB_G0283429	noagg_ripple_up
DDB_G0283467	DDB_G0283467	noagg_ripple_up
DDB_G0283579	crlD	noagg_ripple_up
DDB_G0283599	limA	noagg_ripple_up
DDB_G0284061	DDB_G0284061	noagg_ripple_up
DDB_G0284449	plbD	noagg_ripple_up
DDB_G0284541	DDB_G0284541	noagg_ripple_up
DDB_G0284615	DDB_G0284615	noagg_ripple_up
DDB_G0284749	DDB_G0284749	noagg_ripple_up
DDB_G0284781	DDB_G0284781	noagg_ripple_up
DDB_G0284783	DDB_G0284783	noagg_ripple_up
DDB_G0284981	DDB_G0284981	noagg_ripple_up
DDB_G0285023	alrF	noagg_ripple_up
DDB_G0285047	DDB_G0285047	noagg_ripple_up
DDB_G0285049	DDB_G0285049	noagg_ripple_up
DDB_G0285115	DDB_G0285115	noagg_ripple_up
DDB_G0285127	DDB_G0285127	noagg_ripple_up
DDB_G0285215	DDB_G0285215	noagg_ripple_up
DDB_G0285555	DDB_G0285555	noagg_ripple_up
DDB_G0285917	DDB_G0285917	noagg_ripple_up
DDB_G0285939	ctnnA	noagg_ripple_up
DDB_G0286121	tagC	noagg_ripple_up
DDB_G0286141	DDB_G0286141	noagg_ripple_up
DDB_G0286251	dnajc3	noagg_ripple_up
DDB_G0286381	DDB_G0286381	noagg_ripple_up
DDB_G0286401	DDB_G0286401	noagg_ripple_up
DDB_G0286743	cyp555A1	noagg_ripple_up
DDB_G0286821	DDB_G0286821	noagg_ripple_up
DDB_G0286917	DDB_G0286917	noagg_ripple_up
DDB_G0286943	DDB_G0286943	noagg_ripple_up
DDB_G0287113	DDB_G0287113	noagg_ripple_up
DDB_G0287175	DDB_G0287175_ps	noagg_ripple_up
DDB_G0287185	DDB_G0287185	noagg_ripple_up
DDB_G0287199	5NT	noagg_ripple_up
DDB_G0287295	forC	noagg_ripple_up
DDB_G0287341	DDB_G0287341	noagg_ripple_up
DDB_G0287569	agl	noagg_ripple_up
DDB_G0288377	gxcH	noagg_ripple_up
DDB_G0288417	DDB_G0288417	noagg_ripple_up
DDB_G0288557	vilA	noagg_ripple_up
DDB_G0288631	DDB_G0288631	noagg_ripple_up
DDB_G0288713	DDB_G0288713	noagg_ripple_up
DDB_G0288793	DDB_G0288793	noagg_ripple_up
DDB_G0288805	DDB_G0288805	noagg_ripple_up
DDB_G0288877	aarA	noagg_ripple_up
DDB_G0288919	psiI	noagg_ripple_up
DDB_G0289043	DDB_G0289043	noagg_ripple_up
DDB_G0289057	DDB_G0289057	noagg_ripple_up
DDB_G0289119	pXi	noagg_ripple_up
DDB_G0289263	DDB_G0289263	noagg_ripple_up
DDB_G0289505	act24	noagg_ripple_up
DDB_G0289525	act30_ps	noagg_ripple_up
DDB_G0289543	ndrD	noagg_ripple_up
DDB_G0289561	DDB_G0289561	noagg_ripple_up
DDB_G0289605	fmoC	noagg_ripple_up
DDB_G0289717	DDB_G0289717	noagg_ripple_up
DDB_G0289725	fscA	noagg_ripple_up
DDB_G0289825	DDB_G0289825	noagg_ripple_up
DDB_G0289869	DDB_G0289869	noagg_ripple_up
DDB_G0289887	DDB_G0289887	noagg_ripple_up
DDB_G0289889	DDB_G0289889	noagg_ripple_up
DDB_G0289929	fmoD	noagg_ripple_up
DDB_G0290057	DDB_G0290057	noagg_ripple_up
DDB_G0290347	DDB_G0290347	noagg_ripple_up
DDB_G0290613	DDB_G0290613	noagg_ripple_up
DDB_G0290633	DDB_G0290633	noagg_ripple_up
DDB_G0290707	cyp514A4	noagg_ripple_up
DDB_G0290737	pks34	noagg_ripple_up
DDB_G0290803	DDB_G0290803	noagg_ripple_up
DDB_G0290825	chlA	noagg_ripple_up
DDB_G0290907	DDB_G0290907	noagg_ripple_up
DDB_G0290941	DDB_G0290941_ps	noagg_ripple_up
DDB_G0291171	DDB_G0291171	noagg_ripple_up
DDB_G0291181	DDB_G0291181	noagg_ripple_up
DDB_G0291249	rrpB	noagg_ripple_up
DDB_G0291251	limD	noagg_ripple_up
DDB_G0291261	DDB_G0291261	noagg_ripple_up
DDB_G0291508	DDB_G0291508	noagg_ripple_up
DDB_G0291524	DDB_G0291524	noagg_ripple_up
DDB_G0291544	DDB_G0291544	noagg_ripple_up
DDB_G0291624	tgrA_ps1	noagg_ripple_up
DDB_G0291666	tgrA2	noagg_ripple_up
DDB_G0291902	DDB_G0291902	noagg_ripple_up
DDB_G0292262	myoM	noagg_ripple_up
DDB_G0292488	pks43_ps	noagg_ripple_up
DDB_G0292562	tgrQ1	noagg_ripple_up
DDB_G0292890	DDB_G0292890	noagg_ripple_up
DDB_G0292968	DDB_G0292968	noagg_ripple_up
DDB_G0293162	DDB_G0293162	noagg_ripple_up
DDB_G0293390	DDB_G0293390	noagg_ripple_up
DDB_G0293450	abcG9	noagg_ripple_up
DDB_G0293494	DDB_G0293494	noagg_ripple_up
DDB_G0293542	DDB_G0293542	noagg_ripple_up
DDB_G0293610	DDB_G0293610	noagg_ripple_up
DDB_G0293814	DDB_G0293814	noagg_ripple_up
DDB_G0293820	DDB_G0293820	noagg_ripple_up
DDB_G0293826	DDB_G0293826	noagg_ripple_up
DDB_G0293942	DDB_G0293942	noagg_ripple_up
DDB_G0293978	gxcJ	noagg_ripple_up
DDB_G0295785	DDB_G0295785	noagg_ripple_up
DDB_G0295811	DDB_G0295811	noagg_ripple_up
DDB_G0295813	DDB_G0295813	noagg_ripple_up
DDB_G0295819	DDB_G0295819	noagg_ripple_up
DDB_G0305367	DDB_G0305367	noagg_ripple_up
DDB_G0284529	DDB_G0284529		ripple_lag_down
DDB_G0270126	rasY		ripple_lag_up		tag_tip_down
DDB_G0267888	DDB_G0267888		ripple_lag_up
DDB_G0268090	DDB_G0268090		ripple_lag_up
DDB_G0268368	mybAA		ripple_lag_up
DDB_G0268640	DDB_G0268640		ripple_lag_up
DDB_G0269116	cmbC		ripple_lag_up
DDB_G0269160	nxnA		ripple_lag_up
DDB_G0269194	trfA		ripple_lag_up
DDB_G0269206	abcG21		ripple_lag_up
DDB_G0269446	DDB_G0269446		ripple_lag_up
DDB_G0270436	DDB_G0270436		ripple_lag_up
DDB_G0271606	DDB_G0271606		ripple_lag_up
DDB_G0272356	DDB_G0272356		ripple_lag_up
DDB_G0272428	pks12_ps		ripple_lag_up
DDB_G0272532	DDB_G0272532		ripple_lag_up
DDB_G0272558	DDB_G0272558		ripple_lag_up
DDB_G0272929	isg12		ripple_lag_up
DDB_G0273145	DDB_G0273145		ripple_lag_up
DDB_G0273357	DDB_G0273357		ripple_lag_up
DDB_G0274273	DDB_G0274273		ripple_lag_up
DDB_G0274655	DDB_G0274655		ripple_lag_up
DDB_G0275005	DDB_G0275005		ripple_lag_up
DDB_G0275533	DDB_G0275533		ripple_lag_up
DDB_G0275873	DDB_G0275873		ripple_lag_up
DDB_G0276125	DDB_G0276125		ripple_lag_up
DDB_G0276407	DDB_G0276407		ripple_lag_up
DDB_G0276459	pakB		ripple_lag_up
DDB_G0276509	DDB_G0276509		ripple_lag_up
DDB_G0277017	gxcN		ripple_lag_up
DDB_G0278069	gacII		ripple_lag_up
DDB_G0278679	cyp513F1		ripple_lag_up
DDB_G0278771	DDB_G0278771		ripple_lag_up
DDB_G0279193	rpb1		ripple_lag_up
DDB_G0279309	DDB_G0279309		ripple_lag_up
DDB_G0279713	aplK		ripple_lag_up
DDB_G0279817	DDB_G0279817		ripple_lag_up
DDB_G0279863	DDB_G0279863		ripple_lag_up
DDB_G0280177	DDB_G0280177		ripple_lag_up
DDB_G0280957	DDB_G0280957		ripple_lag_up
DDB_G0281169	DDB_G0281169		ripple_lag_up
DDB_G0281255	sec24		ripple_lag_up
DDB_G0281573	gefP		ripple_lag_up
DDB_G0281829	gtaJ		ripple_lag_up
DDB_G0281997	DDB_G0281997		ripple_lag_up
DDB_G0282187	DDB_G0282187		ripple_lag_up
DDB_G0283259	DDB_G0283259		ripple_lag_up
DDB_G0283373	DDB_G0283373		ripple_lag_up
DDB_G0283919	DDB_G0283919		ripple_lag_up
DDB_G0284459	DDB_G0284459		ripple_lag_up
DDB_G0284931	DDB_G0284931		ripple_lag_up
DDB_G0285063	DDB_G0285063		ripple_lag_up
DDB_G0285641	gacJ		ripple_lag_up
DDB_G0286321	DDB_G0286321		ripple_lag_up
DDB_G0286355	mhcA		ripple_lag_up
DDB_G0286419	cyp519E1		ripple_lag_up
DDB_G0286967	med25		ripple_lag_up
DDB_G0287085	DDB_G0287085		ripple_lag_up
DDB_G0287221	DDB_G0287221		ripple_lag_up
DDB_G0289151	mybI		ripple_lag_up
DDB_G0289705	DDB_G0289705		ripple_lag_up
DDB_G0289719	DDB_G0289719		ripple_lag_up
DDB_G0289731	DDB_G0289731		ripple_lag_up
DDB_G0289779	fmoA		ripple_lag_up
DDB_G0289987	puf118		ripple_lag_up
DDB_G0291608	DDB_G0291608		ripple_lag_up
DDB_G0292150	ak1		ripple_lag_up
DDB_G0292696	colA		ripple_lag_up
DDB_G0293010	aplD		ripple_lag_up
DDB_G0293586	DDB_G0293586		ripple_lag_up
DDB_G0293596	DDB_G0293596		ripple_lag_up
DDB_G0349530	DDB_G0349530		ripple_lag_up
DDB_G0275649	DDB_G0275649			lag_tag_down
DDB_G0279815	DDB_G0279815			lag_tag_down
DDB_G0280603	rliD			lag_tag_down
DDB_G0283693	DDB_G0283693			lag_tag_down
DDB_G0285423	DG2044			lag_tag_down
DDB_G0289073	csaA			lag_tag_down
DDB_G0293302	DDB_G0293302			lag_tag_down
DDB_G0268158	DDB_G0268158			lag_tag_up				Mhat_cul_down
DDB_G0267396	kif2			lag_tag_up
DDB_G0267544	aslM			lag_tag_up
DDB_G0267632	DDB_G0267632			lag_tag_up
DDB_G0267690	icpA			lag_tag_up
DDB_G0267748	cdc45			lag_tag_up
DDB_G0267750	DDB_G0267750			lag_tag_up
DDB_G0267904	DDB_G0267904			lag_tag_up
DDB_G0267958	DDB_G0267958			lag_tag_up
DDB_G0268204	gnt9			lag_tag_up
DDB_G0268258	kif12			lag_tag_up
DDB_G0268312	DDB_G0268312			lag_tag_up
DDB_G0268590	DDB_G0268590			lag_tag_up
DDB_G0268856	DDB_G0268856			lag_tag_up
DDB_G0268992	anapc10			lag_tag_up
DDB_G0269092	DDB_G0269092			lag_tag_up
DDB_G0269178	racG			lag_tag_up
DDB_G0269180	rcdP			lag_tag_up
DDB_G0269324	gins4			lag_tag_up
DDB_G0269592	DDB_G0269592			lag_tag_up
DDB_G0269684	DDB_G0269684			lag_tag_up
DDB_G0269702	DDB_G0269702			lag_tag_up
DDB_G0269800	DDB_G0269800			lag_tag_up
DDB_G0270002	DDB_G0270002			lag_tag_up
DDB_G0270442	polA3			lag_tag_up
DDB_G0270578	DDB_G0270578			lag_tag_up
DDB_G0270764	myh			lag_tag_up
DDB_G0270814	nek2			lag_tag_up
DDB_G0270920	DDB_G0270920			lag_tag_up
DDB_G0271034	DDB_G0271034			lag_tag_up
DDB_G0271078	orcC			lag_tag_up
DDB_G0271156	DDB_G0271156_ps			lag_tag_up
DDB_G0271228	DDB_G0271228			lag_tag_up
DDB_G0271286	clasp			lag_tag_up
DDB_G0271302	DDB_G0271302			lag_tag_up
DDB_G0271394	DDB_G0271394			lag_tag_up
DDB_G0271400	dcc1			lag_tag_up
DDB_G0271510	DDB_G0271510			lag_tag_up
DDB_G0271512	trmt61			lag_tag_up
DDB_G0271520	pks5			lag_tag_up
DDB_G0271562	orcD			lag_tag_up
DDB_G0271656	DDB_G0271656			lag_tag_up
DDB_G0271698	DDB_G0271698			lag_tag_up
DDB_G0271700	DDB_G0271700			lag_tag_up
DDB_G0271712	sigN6			lag_tag_up
DDB_G0271714	sigN12			lag_tag_up
DDB_G0271716	sigN14			lag_tag_up
DDB_G0271718	sigN9			lag_tag_up
DDB_G0271738	tubC			lag_tag_up
DDB_G0271800	DDB_G0271800			lag_tag_up
DDB_G0271818	sigN7			lag_tag_up
DDB_G0271822	sigN11			lag_tag_up
DDB_G0271824	sigN8			lag_tag_up
DDB_G0272114	orfR1062			lag_tag_up
DDB_G0272240	fscD			lag_tag_up
DDB_G0272316	DDB_G0272316			lag_tag_up
DDB_G0272368	ndm			lag_tag_up
DDB_G0272512	DDB_G0272512			lag_tag_up
DDB_G0272616	rnrB-1			lag_tag_up
DDB_G0272654	sigN25			lag_tag_up
DDB_G0272658	sigN1			lag_tag_up
DDB_G0272760	mcm6			lag_tag_up
DDB_G0272921	DDB_G0272921			lag_tag_up
DDB_G0272927	sigN3			lag_tag_up
DDB_G0273021	sigN5			lag_tag_up
DDB_G0273023	sigN2			lag_tag_up
DDB_G0273181	DDB_G0273181			lag_tag_up
DDB_G0273201	DDB_G0273201			lag_tag_up
DDB_G0273351	DDB_G0273351			lag_tag_up
DDB_G0274173	DDB_G0274173			lag_tag_up
DDB_G0274269	DDB_G0274269			lag_tag_up
DDB_G0274341	htmA			lag_tag_up
DDB_G0274385	DDB_G0274385			lag_tag_up
DDB_G0274435	DDB_G0274435			lag_tag_up
DDB_G0274503	plk			lag_tag_up
DDB_G0274825	DDB_G0274825			lag_tag_up
DDB_G0274849	DDB_G0274849			lag_tag_up
DDB_G0274865	DDB_G0274865			lag_tag_up
DDB_G0274947	DDB_G0274947			lag_tag_up
DDB_G0275255	DDB_G0275255			lag_tag_up
DDB_G0275493	cycB			lag_tag_up
DDB_G0275623	mcm4			lag_tag_up
DDB_G0275809	msh2			lag_tag_up
DDB_G0275929	pds5			lag_tag_up
DDB_G0275983	cdc6			lag_tag_up
DDB_G0276101	smc3			lag_tag_up
DDB_G0276287	expl3			lag_tag_up
DDB_G0276451	DDB_G0276451			lag_tag_up
DDB_G0276693	DDB_G0276693			lag_tag_up
DDB_G0276967	racF2			lag_tag_up
DDB_G0276977	rad21			lag_tag_up
DDB_G0277469	DDB_G0277469			lag_tag_up
DDB_G0277633	DDB_G0277633_ps			lag_tag_up
DDB_G0277693	DDB_G0277693			lag_tag_up
DDB_G0277695	DDB_G0277695			lag_tag_up
DDB_G0277967	DDB_G0277967			lag_tag_up
DDB_G0278073	DDB_G0278073			lag_tag_up
DDB_G0278367	DDB_G0278367			lag_tag_up
DDB_G0278385	DDB_G0278385			lag_tag_up
DDB_G0278389	rsmF			lag_tag_up
DDB_G0278469	DDB_G0278469			lag_tag_up
DDB_G0278627	DDB_G0278627			lag_tag_up
DDB_G0278719	DDB_G0278719			lag_tag_up
DDB_G0278825	DDB_G0278825			lag_tag_up
DDB_G0278911	DDB_G0278911			lag_tag_up
DDB_G0279101	DDB_G0279101			lag_tag_up
DDB_G0279305	rsmJ			lag_tag_up
DDB_G0279343	aurK			lag_tag_up
DDB_G0279459	DDB_G0279459			lag_tag_up
DDB_G0279531	DDB_G0279531			lag_tag_up
DDB_G0279553	nuf2			lag_tag_up
DDB_G0279923	apnA			lag_tag_up
DDB_G0280019	DDB_G0280019			lag_tag_up
DDB_G0280045	thyA			lag_tag_up
DDB_G0280249	ase1A			lag_tag_up
DDB_G0280309	mcm3			lag_tag_up
DDB_G0280397	DDB_G0280397			lag_tag_up
DDB_G0280685	DDB_G0280685_ps			lag_tag_up
DDB_G0280687	arrI_ps			lag_tag_up
DDB_G0280859	DDB_G0280859			lag_tag_up
DDB_G0280949	DDB_G0280949			lag_tag_up
DDB_G0280995	mps1			lag_tag_up
DDB_G0281241	coq2			lag_tag_up
DDB_G0281273	DDB_G0281273			lag_tag_up
DDB_G0281419	ncapGa			lag_tag_up
DDB_G0281641	polD2			lag_tag_up
DDB_G0281927	DDB_G0281927			lag_tag_up
DDB_G0282179	DDB_G0282179			lag_tag_up
DDB_G0282191	polA1			lag_tag_up
DDB_G0282235	rfc5			lag_tag_up
DDB_G0282413	DDB_G0282413			lag_tag_up
DDB_G0282551	DDB_G0282551			lag_tag_up
DDB_G0282731	polA2			lag_tag_up
DDB_G0282821	DDB_G0282821			lag_tag_up
DDB_G0282833	DDB_G0282833			lag_tag_up
DDB_G0282933	mcm7			lag_tag_up
DDB_G0282987	hcpB			lag_tag_up
DDB_G0283161	DDB_G0283161			lag_tag_up
DDB_G0283189	DDB_G0283189			lag_tag_up
DDB_G0283257	samkE_ps2			lag_tag_up
DDB_G0283381	DDB_G0283381			lag_tag_up
DDB_G0283555	DDB_G0283555			lag_tag_up
DDB_G0283681	DDB_G0283681			lag_tag_up
DDB_G0283711	DDB_G0283711			lag_tag_up
DDB_G0283713	DDB_G0283713			lag_tag_up
DDB_G0283771	DDB_G0283771			lag_tag_up
DDB_G0283999	DDB_G0283999			lag_tag_up
DDB_G0284013	spc25			lag_tag_up
DDB_G0284031	DDB_G0284031			lag_tag_up
DDB_G0284071	rnrA			lag_tag_up
DDB_G0284147	DDB_G0284147			lag_tag_up
DDB_G0284263	DDB_G0284263			lag_tag_up
DDB_G0284327	tmem184F			lag_tag_up
DDB_G0284373	DDB_G0284373			lag_tag_up
DDB_G0284519	forI			lag_tag_up
DDB_G0284623	DDB_G0284623			lag_tag_up
DDB_G0284675	DDB_G0284675			lag_tag_up
DDB_G0284731	DDB_G0284731			lag_tag_up
DDB_G0284987	repG			lag_tag_up
DDB_G0285101	kif4			lag_tag_up
DDB_G0285173	DDB_G0285173			lag_tag_up
DDB_G0285183	DDB_G0285183			lag_tag_up
DDB_G0285245	DDB_G0285245			lag_tag_up
DDB_G0285601	cdc20			lag_tag_up
DDB_G0285671	DDB_G0285671			lag_tag_up
DDB_G0285805	DDB_G0285805			lag_tag_up
DDB_G0285853	polA4			lag_tag_up
DDB_G0285869	DDB_G0285869			lag_tag_up
DDB_G0285929	DDB_G0285929			lag_tag_up
DDB_G0286027	rfc4			lag_tag_up
DDB_G0286037	lrlA			lag_tag_up
DDB_G0286227	DDB_G0286227			lag_tag_up
DDB_G0286233	anapc6			lag_tag_up
DDB_G0286241	aifD			lag_tag_up
DDB_G0286333	DDB_G0286333			lag_tag_up
DDB_G0286403	smc4			lag_tag_up
DDB_G0286465	DDB_G0286465			lag_tag_up
DDB_G0286623	mcm2			lag_tag_up
DDB_G0286781	DDB_G0286781			lag_tag_up
DDB_G0286807	DDB_G0286807			lag_tag_up
DDB_G0286877	DDB_G0286877			lag_tag_up
DDB_G0287103	DDB_G0287103			lag_tag_up
DDB_G0287115	DDB_G0287115			lag_tag_up
DDB_G0287173	DDB_G0287173_ps			lag_tag_up
DDB_G0287177	DDB_G0287177			lag_tag_up
DDB_G0287291	abpD			lag_tag_up
DDB_G0287339	DDB_G0287339			lag_tag_up
DDB_G0287499	DDB_G0287499			lag_tag_up
DDB_G0287547	DDB_G0287547			lag_tag_up
DDB_G0287607	pcna			lag_tag_up
DDB_G0287675	DDB_G0287675			lag_tag_up
DDB_G0287791	gcvH3			lag_tag_up
DDB_G0287815	DDB_G0287815			lag_tag_up
DDB_G0287885	DDB_G0287885			lag_tag_up
DDB_G0287899	rif1			lag_tag_up
DDB_G0287991	DDB_G0287991			lag_tag_up
DDB_G0288059	DDB_G0288059			lag_tag_up
DDB_G0288125	DDB_G0288125			lag_tag_up
DDB_G0288223	anapc3			lag_tag_up
DDB_G0288231	DDB_G0288231			lag_tag_up
DDB_G0288361	kif13			lag_tag_up
DDB_G0288623	cbpH			lag_tag_up
DDB_G0288681	prpD			lag_tag_up
DDB_G0288819	ncapG2			lag_tag_up
DDB_G0288873	pich			lag_tag_up
DDB_G0289167	DDB_G0289167			lag_tag_up
DDB_G0289271	gins1			lag_tag_up
DDB_G0289395	crlB			lag_tag_up
DDB_G0289513	rfa1			lag_tag_up
DDB_G0289517	DDB_G0289517			lag_tag_up
DDB_G0289655	abcG7			lag_tag_up
DDB_G0289673	DDB_G0289673			lag_tag_up
DDB_G0290033	dtymk			lag_tag_up
DDB_G0290107	DDB_G0290107			lag_tag_up
DDB_G0290243	act39_ps			lag_tag_up
DDB_G0290283	DDB_G0290283			lag_tag_up
DDB_G0290373	DDB_G0290373			lag_tag_up
DDB_G0290467	pks27			lag_tag_up
DDB_G0290469	pks28			lag_tag_up
DDB_G0290551	rblA			lag_tag_up
DDB_G0290675	DDB_G0290675			lag_tag_up
DDB_G0290699	pks29			lag_tag_up
DDB_G0290799	DDB_G0290799			lag_tag_up
DDB_G0290897	DDB_G0290897_ps			lag_tag_up
DDB_G0290919	smc5			lag_tag_up
DDB_G0291059	DDB_G0291059			lag_tag_up
DDB_G0291602	DDB_G0291602			lag_tag_up
DDB_G0291618	DDB_G0291618			lag_tag_up
DDB_G0291752	smc1			lag_tag_up
DDB_G0291806	DDB_G0291806			lag_tag_up
DDB_G0291818	DDB_G0291818			lag_tag_up
DDB_G0291868	rfc2			lag_tag_up
DDB_G0291894	ncapH2			lag_tag_up
DDB_G0292004	docC			lag_tag_up
DDB_G0292134	bub3			lag_tag_up
DDB_G0292274	DDB_G0292274_ps			lag_tag_up
DDB_G0292292	DDB_G0292292			lag_tag_up
DDB_G0292444	DDB_G0292444			lag_tag_up
DDB_G0292470	anapc7			lag_tag_up
DDB_G0292520	DDB_G0292520			lag_tag_up
DDB_G0292526	DDB_G0292526			lag_tag_up
DDB_G0292676	bub1			lag_tag_up
DDB_G0292760	lig4			lag_tag_up
DDB_G0292772	tgrG1			lag_tag_up
DDB_G0292782	mybN			lag_tag_up
DDB_G0292792	cyp508C1			lag_tag_up
DDB_G0292856	DDB_G0292856			lag_tag_up
DDB_G0292958	mcm5			lag_tag_up
DDB_G0293198	kif10			lag_tag_up
DDB_G0293374	dut			lag_tag_up
DDB_G0293396	gxcO			lag_tag_up
DDB_G0293564	gins2			lag_tag_up
DDB_G0293620	DDB_G0293620			lag_tag_up
DDB_G0293656	fhkA			lag_tag_up
DDB_G0293702	rfc3			lag_tag_up
DDB_G0294609	polD3			lag_tag_up
DDB_G0295685	sigN10			lag_tag_up
DDB_G0295827	DDB_G0295827			lag_tag_up
DDB_G0349537	DDB_G0349537			lag_tag_up
DDB_G0271274	DDB_G0271274				tag_tip_down
DDB_G0271696	prtA				tag_tip_down
DDB_G0271872	DDB_G0271872				tag_tip_down
DDB_G0271878	DDB_G0271878				tag_tip_down
DDB_G0273129	fnkD-1				tag_tip_down
DDB_G0277863	pdiA				tag_tip_down
DDB_G0278651	manE				tag_tip_down
DDB_G0279575	DDB_G0279575				tag_tip_down
DDB_G0281067	DDB_G0281067				tag_tip_down
DDB_G0282175	grlF				tag_tip_down
DDB_G0283791	DDB_G0283791				tag_tip_down
DDB_G0283993	DDB_G0283993				tag_tip_down
DDB_G0286709	gpt9				tag_tip_down
DDB_G0286893	act29				tag_tip_down
DDB_G0286895	grlD				tag_tip_down
DDB_G0286907	ubqD				tag_tip_down
DDB_G0288103	sibB				tag_tip_down
DDB_G0288511	sadA				tag_tip_down
DDB_G0288869	DDB_G0288869				tag_tip_down
DDB_G0268400	DDB_G0268400				tag_tip_up
DDB_G0268458	DDB_G0268458				tag_tip_up
DDB_G0270520	DDB_G0270520				tag_tip_up
DDB_G0270614	DDB_G0270614				tag_tip_up
DDB_G0271888	DDB_G0271888				tag_tip_up
DDB_G0272042	DDB_G0272042				tag_tip_up
DDB_G0272510	tps2				tag_tip_up
DDB_G0272556	cyp519C1				tag_tip_up
DDB_G0276655	DDB_G0276655				tag_tip_up
DDB_G0276741	DDB_G0276741				tag_tip_up
DDB_G0277871	rsc12				tag_tip_up
DDB_G0278513	DDB_G0278513				tag_tip_up
DDB_G0280517	DDB_G0280517				tag_tip_up
DDB_G0281191	DDB_G0281191				tag_tip_up
DDB_G0281507	colC				tag_tip_up
DDB_G0282415	DDB_G0282415				tag_tip_up
DDB_G0283421	DDB_G0283421				tag_tip_up
DDB_G0283501	DDB_G0283501				tag_tip_up
DDB_G0283503	DDB_G0283503				tag_tip_up
DDB_G0283505	DDB_G0283505				tag_tip_up
DDB_G0283509	DDB_G0283509				tag_tip_up
DDB_G0283511	DDB_G0283511				tag_tip_up
DDB_G0283517	DDB_G0283517				tag_tip_up
DDB_G0284283	DDB_G0284283				tag_tip_up
DDB_G0286193	DDB_G0286193				tag_tip_up
DDB_G0286689	DDB_G0286689				tag_tip_up
DDB_G0286851	tgrE1				tag_tip_up
DDB_G0289969	DDB_G0289969				tag_tip_up
DDB_G0290245	psiC				tag_tip_up
DDB_G0290925	psiD				tag_tip_up
DDB_G0292168	cyp516A1				tag_tip_up
DDB_G0292476	DDB_G0292476				tag_tip_up
DDB_G0292976	DDB_G0292976				tag_tip_up
DDB_G0293358	hssB				tag_tip_up
DDB_G0293888	omt12				tag_tip_up
DDB_G0281015	DDB_G0281015					tip_slug_up		Mhat_cul_down
DDB_G0269938	osbB					tip_slug_up
DDB_G0280925	DDB_G0280925					tip_slug_up
DDB_G0280927	DDB_G0280927					tip_slug_up
DDB_G0280931	DDB_G0280931					tip_slug_up
DDB_G0280997	DDB_G0280997					tip_slug_up
DDB_G0281007	DDB_G0281007					tip_slug_up
DDB_G0281009	DDB_G0281009_ps					tip_slug_up
DDB_G0281019	DDB_G0281019					tip_slug_up
DDB_G0282315	DDB_G0282315					tip_slug_up
DDB_G0283395	DDB_G0283395					tip_slug_up
DDB_G0286667	DDB_G0286667					tip_slug_up
DDB_G0277699	DDB_G0277699						slug_Mhat_up		cul_FB_down
DDB_G0291291	ecmF						slug_Mhat_up		cul_FB_down
DDB_G0267418	sahA						slug_Mhat_up
DDB_G0267562	stcA						slug_Mhat_up
DDB_G0267620	DDB_G0267620						slug_Mhat_up
DDB_G0267862	DDB_G0267862						slug_Mhat_up
DDB_G0268028	DDB_G0268028						slug_Mhat_up
DDB_G0268170	DDB_G0268170						slug_Mhat_up
DDB_G0268748	DDB_G0268748						slug_Mhat_up
DDB_G0269132	ecmB						slug_Mhat_up
DDB_G0269136	efaAII						slug_Mhat_up
DDB_G0269198	wimA						slug_Mhat_up
DDB_G0269558	gnt11						slug_Mhat_up
DDB_G0269998	DDB_G0269998						slug_Mhat_up
DDB_G0270240	DDB_G0270240						slug_Mhat_up
DDB_G0270258	DDB_G0270258						slug_Mhat_up
DDB_G0270290	DDB_G0270290						slug_Mhat_up
DDB_G0270292	DDB_G0270292						slug_Mhat_up
DDB_G0270306	DDB_G0270306						slug_Mhat_up
DDB_G0270628	DDB_G0270628						slug_Mhat_up
DDB_G0270658	acbA						slug_Mhat_up
DDB_G0270710	DDB_G0270710						slug_Mhat_up
DDB_G0270750	DDB_G0270750						slug_Mhat_up
DDB_G0270940	DDB_G0270940						slug_Mhat_up
DDB_G0271374	DDB_G0271374						slug_Mhat_up
DDB_G0271640	DDB_G0271640						slug_Mhat_up
DDB_G0271730	DDB_G0271730						slug_Mhat_up
DDB_G0271786	DDB_G0271786						slug_Mhat_up
DDB_G0271802	DDB_G0271802						slug_Mhat_up
DDB_G0272156	DDB_G0272156						slug_Mhat_up
DDB_G0272438	DDB_G0272438						slug_Mhat_up
DDB_G0272464	DDB_G0272464						slug_Mhat_up
DDB_G0272468	DDB_G0272468						slug_Mhat_up
DDB_G0272524	malA						slug_Mhat_up
DDB_G0272674	DDB_G0272674						slug_Mhat_up
DDB_G0273069	ndkC-1						slug_Mhat_up
DDB_G0273091	zplC-1						slug_Mhat_up
DDB_G0273115	DDB_G0273115						slug_Mhat_up
DDB_G0273333	irlB-1						slug_Mhat_up
DDB_G0273419	DDB_G0273419						slug_Mhat_up
DDB_G0273437	DDB_G0273437						slug_Mhat_up
DDB_G0274121	abcA4						slug_Mhat_up
DDB_G0274189	ecmJ						slug_Mhat_up
DDB_G0274245	DDB_G0274245						slug_Mhat_up
DDB_G0274267	DDB_G0274267						slug_Mhat_up
DDB_G0274299	DDB_G0274299						slug_Mhat_up
DDB_G0274713	DDB_G0274713						slug_Mhat_up
DDB_G0275137	DDB_G0275137						slug_Mhat_up
DDB_G0275229	DDB_G0275229_ps						slug_Mhat_up
DDB_G0275231	DDB_G0275231						slug_Mhat_up
DDB_G0275419	DDB_G0275419						slug_Mhat_up
DDB_G0275579	DDB_G0275579						slug_Mhat_up
DDB_G0275731	iqgD						slug_Mhat_up
DDB_G0275741	dio3						slug_Mhat_up
DDB_G0275817	DDB_G0275817						slug_Mhat_up
DDB_G0275819	DDB_G0275819						slug_Mhat_up
DDB_G0275901	DDB_G0275901						slug_Mhat_up
DDB_G0276375	DDB_G0276375						slug_Mhat_up
DDB_G0277025	DDB_G0277025						slug_Mhat_up
DDB_G0277099	uduE						slug_Mhat_up
DDB_G0277271	DDB_G0277271						slug_Mhat_up
DDB_G0277535	rgn						slug_Mhat_up
DDB_G0277583	DDB_G0277583						slug_Mhat_up
DDB_G0277603	DDB_G0277603						slug_Mhat_up
DDB_G0277637	DDB_G0277637						slug_Mhat_up
DDB_G0277737	DDB_G0277737						slug_Mhat_up
DDB_G0277757	staD						slug_Mhat_up
DDB_G0277773	DDB_G0277773						slug_Mhat_up
DDB_G0277891	rimA						slug_Mhat_up
DDB_G0278127	DDB_G0278127						slug_Mhat_up
DDB_G0278317	mybF						slug_Mhat_up
DDB_G0278347	DDB_G0278347						slug_Mhat_up
DDB_G0278401	cprH						slug_Mhat_up
DDB_G0278403	rsmH						slug_Mhat_up
DDB_G0278421	DDB_G0278421						slug_Mhat_up
DDB_G0278557	DDB_G0278557						slug_Mhat_up
DDB_G0278565	DDB_G0278565						slug_Mhat_up
DDB_G0278625	DDB_G0278625						slug_Mhat_up
DDB_G0279011	DDB_G0279011						slug_Mhat_up
DDB_G0279125	DDB_G0279125						slug_Mhat_up
DDB_G0279353	DDB_G0279353						slug_Mhat_up
DDB_G0279429	DDB_G0279429						slug_Mhat_up
DDB_G0279465	tgds						slug_Mhat_up
DDB_G0279609	DDB_G0279609						slug_Mhat_up
DDB_G0279643	DDB_G0279643						slug_Mhat_up
DDB_G0279645	DDB_G0279645						slug_Mhat_up
DDB_G0279727	DDB_G0279727						slug_Mhat_up
DDB_G0280157	DDB_G0280157						slug_Mhat_up
DDB_G0280215	DDB_G0280215						slug_Mhat_up
DDB_G0280415	DDB_G0280415						slug_Mhat_up
DDB_G0280425	DDB_G0280425						slug_Mhat_up
DDB_G0280433	DDB_G0280433						slug_Mhat_up
DDB_G0280537	wacA						slug_Mhat_up
DDB_G0280769	DDB_G0280769						slug_Mhat_up
DDB_G0280771	DDB_G0280771						slug_Mhat_up
DDB_G0280881	DDB_G0280881						slug_Mhat_up
DDB_G0281057	DDB_G0281057						slug_Mhat_up
DDB_G0281467	tps5						slug_Mhat_up
DDB_G0281951	cyrA						slug_Mhat_up
DDB_G0281969	mybE						slug_Mhat_up
DDB_G0281999	DDB_G0281999						slug_Mhat_up
DDB_G0282021	DDB_G0282021						slug_Mhat_up
DDB_G0282245	forD						slug_Mhat_up
DDB_G0282275	DDB_G0282275						slug_Mhat_up
DDB_G0282399	DDB_G0282399						slug_Mhat_up
DDB_G0282401	DDB_G0282401						slug_Mhat_up
DDB_G0282635	DDB_G0282635						slug_Mhat_up
DDB_G0282637	DDB_G0282637						slug_Mhat_up
DDB_G0282869	sslA_ps1						slug_Mhat_up
DDB_G0282937	DDB_G0282937						slug_Mhat_up
DDB_G0283191	DDB_G0283191						slug_Mhat_up
DDB_G0283205	top1						slug_Mhat_up
DDB_G0283383	DDB_G0283383						slug_Mhat_up
DDB_G0283627	prsC						slug_Mhat_up
DDB_G0283729	DDB_G0283729						slug_Mhat_up
DDB_G0283763	grpE						slug_Mhat_up
DDB_G0283817	DDB_G0283817						slug_Mhat_up
DDB_G0283959	DDB_G0283959						slug_Mhat_up
DDB_G0283961	DDB_G0283961						slug_Mhat_up
DDB_G0284351	DDB_G0284351						slug_Mhat_up
DDB_G0284393	DDB_G0284393						slug_Mhat_up
DDB_G0284395	DDB_G0284395						slug_Mhat_up
DDB_G0284427	DDB_G0284427						slug_Mhat_up
DDB_G0284907	DDB_G0284907						slug_Mhat_up
DDB_G0285029	sfxn						slug_Mhat_up
DDB_G0285259	DDB_G0285259						slug_Mhat_up
DDB_G0285299	DDB_G0285299						slug_Mhat_up
DDB_G0285409	DDB_G0285409						slug_Mhat_up
DDB_G0285549	DDB_G0285549						slug_Mhat_up
DDB_G0285551	DDB_G0285551						slug_Mhat_up
DDB_G0285565	DDB_G0285565_ps						slug_Mhat_up
DDB_G0285669	DDB_G0285669						slug_Mhat_up
DDB_G0286053	DDB_G0286053						slug_Mhat_up
DDB_G0286055	DDB_G0286055						slug_Mhat_up
DDB_G0286061	DDB_G0286061						slug_Mhat_up
DDB_G0286081	DDB_G0286081						slug_Mhat_up
DDB_G0286305	DDB_G0286305						slug_Mhat_up
DDB_G0286309	DDB_G0286309						slug_Mhat_up
DDB_G0286373	DDB_G0286373						slug_Mhat_up
DDB_G0286475	DDB_G0286475						slug_Mhat_up
DDB_G0286499	pspG						slug_Mhat_up
DDB_G0286505	DDB_G0286505						slug_Mhat_up
DDB_G0286605	DDB_G0286605						slug_Mhat_up
DDB_G0286663	ecmC						slug_Mhat_up
DDB_G0286751	DDB_G0286751						slug_Mhat_up
DDB_G0286767	DDB_G0286767						slug_Mhat_up
DDB_G0286905	pspE						slug_Mhat_up
DDB_G0286979	DDB_G0286979						slug_Mhat_up
DDB_G0286995	DDB_G0286995						slug_Mhat_up
DDB_G0286999	DDB_G0286999						slug_Mhat_up
DDB_G0287119	pks24						slug_Mhat_up
DDB_G0287163	DDB_G0287163						slug_Mhat_up
DDB_G0287257	DDB_G0287257						slug_Mhat_up
DDB_G0287367	DDB_G0287367						slug_Mhat_up
DDB_G0287389	DDB_G0287389						slug_Mhat_up
DDB_G0287465	DDB_G0287465						slug_Mhat_up
DDB_G0287479	DDB_G0287479						slug_Mhat_up
DDB_G0288153	DDB_G0288153						slug_Mhat_up
DDB_G0288369	DDB_G0288369						slug_Mhat_up
DDB_G0288535	DDB_G0288535						slug_Mhat_up
DDB_G0288723	DDB_G0288723						slug_Mhat_up
DDB_G0288853	DDB_G0288853						slug_Mhat_up
DDB_G0288915	DDB_G0288915						slug_Mhat_up
DDB_G0289101	DDB_G0289101						slug_Mhat_up
DDB_G0289195	DDB_G0289195						slug_Mhat_up
DDB_G0289353	cox11						slug_Mhat_up
DDB_G0289741	DDB_G0289741						slug_Mhat_up
DDB_G0289743	DDB_G0289743						slug_Mhat_up
DDB_G0289919	ponJ						slug_Mhat_up
DDB_G0290155	DDB_G0290155						slug_Mhat_up
DDB_G0290187	hspH						slug_Mhat_up
DDB_G0290205	DDB_G0290205						slug_Mhat_up
DDB_G0290285	DDB_G0290285						slug_Mhat_up
DDB_G0290421	DDB_G0290421						slug_Mhat_up
DDB_G0290505	DDB_G0290505						slug_Mhat_up
DDB_G0290533	DDB_G0290533						slug_Mhat_up
DDB_G0290557	DDB_G0290557						slug_Mhat_up
DDB_G0290627	DDB_G0290627						slug_Mhat_up
DDB_G0290691	DDB_G0290691						slug_Mhat_up
DDB_G0290801	DDB_G0290801						slug_Mhat_up
DDB_G0291101	DDB_G0291101						slug_Mhat_up
DDB_G0291103	DDB_G0291103						slug_Mhat_up
DDB_G0291111	DDB_G0291111						slug_Mhat_up
DDB_G0291117	noxC						slug_Mhat_up
DDB_G0291145	msrB						slug_Mhat_up
DDB_G0291348	DDB_G0291348						slug_Mhat_up
DDB_G0291582	DDB_G0291582_ps						slug_Mhat_up
DDB_G0291786	DDB_G0291786						slug_Mhat_up
DDB_G0292162	DDB_G0292162						slug_Mhat_up
DDB_G0292218	st15						slug_Mhat_up
DDB_G0292220	ecmH						slug_Mhat_up
DDB_G0292364	DDB_G0292364_TE						slug_Mhat_up
DDB_G0292734	DDB_G0292734						slug_Mhat_up
DDB_G0292810	gluA						slug_Mhat_up
DDB_G0292868	golt1						slug_Mhat_up
DDB_G0292892	DDB_G0292892						slug_Mhat_up
DDB_G0293186	DDB_G0293186						slug_Mhat_up
DDB_G0293292	DDB_G0293292						slug_Mhat_up
DDB_G0293298	mhsp70						slug_Mhat_up
DDB_G0293594	DDB_G0293594						slug_Mhat_up
DDB_G0295787	hbx11						slug_Mhat_up
DDB_G0295833	DDB_G0295833						slug_Mhat_up
DDB_G0268984	DDB_G0268984							Mhat_cul_down
DDB_G0270342	DDB_G0270342							Mhat_cul_down
DDB_G0275481	DDB_G0275481							Mhat_cul_down
DDB_G0276793	DDB_G0276793							Mhat_cul_down
DDB_G0278657	DDB_G0278657_ps							Mhat_cul_down
DDB_G0279119	DDB_G0279119							Mhat_cul_down
DDB_G0293676	DDB_G0293676							Mhat_cul_down
DDB_G0268248	DDB_G0268248							Mhat_cul_up
DDB_G0268750	DDB_G0268750							Mhat_cul_up
DDB_G0268812	DDB_G0268812							Mhat_cul_up
DDB_G0269622	DDB_G0269622							Mhat_cul_up
DDB_G0269730	DDB_G0269730							Mhat_cul_up
DDB_G0271260	DDB_G0271260							Mhat_cul_up
DDB_G0273213	aslA-1							Mhat_cul_up
DDB_G0273261	sigL-1							Mhat_cul_up
DDB_G0274157	DDB_G0274157							Mhat_cul_up
DDB_G0274615	DDB_G0274615							Mhat_cul_up
DDB_G0274663	DDB_G0274663							Mhat_cul_up
DDB_G0275051	DDB_G0275051_ps							Mhat_cul_up
DDB_G0275163	DDB_G0275163							Mhat_cul_up
DDB_G0275275	DDB_G0275275							Mhat_cul_up
DDB_G0275337	DDB_G0275337							Mhat_cul_up
DDB_G0276157	pkgA							Mhat_cul_up
DDB_G0276469	syn16B							Mhat_cul_up
DDB_G0277001	cpiC							Mhat_cul_up
DDB_G0277581	DDB_G0277581							Mhat_cul_up
DDB_G0278423	DDB_G0278423							Mhat_cul_up
DDB_G0278563	DDB_G0278563							Mhat_cul_up
DDB_G0279557	DDB_G0279557							Mhat_cul_up
DDB_G0280217	DDB_G0280217							Mhat_cul_up
DDB_G0280633	arrK							Mhat_cul_up
DDB_G0280781	DDB_G0280781							Mhat_cul_up
DDB_G0281117	DDB_G0281117							Mhat_cul_up
DDB_G0281513	DDB_G0281513							Mhat_cul_up
DDB_G0282403	DDB_G0282403							Mhat_cul_up
DDB_G0282883	DDB_G0282883							Mhat_cul_up
DDB_G0283651	DDB_G0283651							Mhat_cul_up
DDB_G0283837	DDB_G0283837							Mhat_cul_up
DDB_G0284303	DDB_G0284303							Mhat_cul_up
DDB_G0286569	DDB_G0286569							Mhat_cul_up
DDB_G0287395	DDB_G0287395							Mhat_cul_up
DDB_G0288185	DDB_G0288185							Mhat_cul_up
DDB_G0288667	DDB_G0288667							Mhat_cul_up
DDB_G0289885	sigF							Mhat_cul_up
DDB_G0289927	fmoF							Mhat_cul_up
DDB_G0290521	DDB_G0290521							Mhat_cul_up
DDB_G0291970	cofB							Mhat_cul_up
DDB_G0292246	DDB_G0292246							Mhat_cul_up
DDB_G0292736	plc							Mhat_cul_up
DDB_G0293708	DDB_G0293708							Mhat_cul_up
DDB_G0293854	DDB_G0293854							Mhat_cul_up
DDB_G0280621	arrJ								cul_FB_down
DDB_G0267578	DDB_G0267578								cul_FB_up
DDB_G0267580	DDB_G0267580								cul_FB_up
DDB_G0267640	gtaE								cul_FB_up
DDB_G0268006	DDB_G0268006								cul_FB_up
DDB_G0268166	DDB_G0268166								cul_FB_up
DDB_G0268200	DDB_G0268200								cul_FB_up
DDB_G0268446	cbhA								cul_FB_up
DDB_G0268630	spsA								cul_FB_up
DDB_G0268718	ptcE								cul_FB_up
DDB_G0268740	lip2								cul_FB_up
DDB_G0268858	DDB_G0268858								cul_FB_up
DDB_G0268964	lip3								cul_FB_up
DDB_G0269112	celB								cul_FB_up
DDB_G0269428	tps1								cul_FB_up
DDB_G0269634	DDB_G0269634								cul_FB_up
DDB_G0269658	DDB_G0269658								cul_FB_up
DDB_G0269904	DDB_G0269904								cul_FB_up
DDB_G0270004	DDB_G0270004								cul_FB_up
DDB_G0270202	DDB_G0270202								cul_FB_up
DDB_G0270280	DDB_G0270280								cul_FB_up
DDB_G0270406	eIF4e3								cul_FB_up
DDB_G0270594	DDB_G0270594								cul_FB_up
DDB_G0270636	DDB_G0270636								cul_FB_up
DDB_G0271110	DDB_G0271110								cul_FB_up
DDB_G0271134	celA								cul_FB_up
DDB_G0271314	iliH								cul_FB_up
DDB_G0271334	DDB_G0271334								cul_FB_up
DDB_G0271658	DDB_G0271658								cul_FB_up
DDB_G0271756	DDB_G0271756								cul_FB_up
DDB_G0271780	DDB_G0271780								cul_FB_up
DDB_G0271920	DDB_G0271920								cul_FB_up
DDB_G0272028	tpp1_ps								cul_FB_up
DDB_G0272214	DDB_G0272214								cul_FB_up
DDB_G0272298	DDB_G0272298								cul_FB_up
DDB_G0272500	DDB_G0272500								cul_FB_up
DDB_G0272570	DDB_G0272570								cul_FB_up
DDB_G0272981	pks13								cul_FB_up
DDB_G0273111	DDB_G0273111								cul_FB_up
DDB_G0273155	DDB_G0273155								cul_FB_up
DDB_G0273337	DDB_G0273337_ps								cul_FB_up
DDB_G0273389	psiG-1								cul_FB_up
DDB_G0274317	DDB_G0274317								cul_FB_up
DDB_G0274335	DDB_G0274335								cul_FB_up
DDB_G0274337	DDB_G0274337								cul_FB_up
DDB_G0274433	DDB_G0274433								cul_FB_up
DDB_G0275433	DDB_G0275433								cul_FB_up
DDB_G0275457	DDB_G0275457								cul_FB_up
DDB_G0275489	DDB_G0275489								cul_FB_up
DDB_G0275521	DDB_G0275521								cul_FB_up
DDB_G0275777	DDB_G0275777								cul_FB_up
DDB_G0275959	DDB_G0275959								cul_FB_up
DDB_G0276143	dhkF								cul_FB_up
DDB_G0276257	DDB_G0276257								cul_FB_up
DDB_G0276285	DDB_G0276285								cul_FB_up
DDB_G0276497	DDB_G0276497								cul_FB_up
DDB_G0276687	DDB_G0276687								cul_FB_up
DDB_G0277215	iptA								cul_FB_up
DDB_G0277385	tps4								cul_FB_up
DDB_G0277709	DDB_G0277709								cul_FB_up
DDB_G0277883	dhkJ								cul_FB_up
DDB_G0277903	cotE								cul_FB_up
DDB_G0277921	sigE								cul_FB_up
DDB_G0278537	DDB_G0278537								cul_FB_up
DDB_G0278553	DDB_G0278553								cul_FB_up
DDB_G0278947	captB								cul_FB_up
DDB_G0279023	DDB_G0279023								cul_FB_up
DDB_G0279355	DDB_G0279355								cul_FB_up
DDB_G0279541	DDB_G0279541								cul_FB_up
DDB_G0279545	DDB_G0279545								cul_FB_up
DDB_G0279651	DDB_G0279651								cul_FB_up
DDB_G0279809	DDB_G0279809								cul_FB_up
DDB_G0280223	iliF								cul_FB_up
DDB_G0280245	ecmL								cul_FB_up
DDB_G0280277	DDB_G0280277								cul_FB_up
DDB_G0280563	DDB_G0280563								cul_FB_up
DDB_G0280581	DDB_G0280581								cul_FB_up
DDB_G0280889	DDB_G0280889								cul_FB_up
DDB_G0280915	DDB_G0280915								cul_FB_up
DDB_G0281139	DDB_G0281139								cul_FB_up
DDB_G0281607	DDB_G0281607								cul_FB_up
DDB_G0281705	DDB_G0281705								cul_FB_up
DDB_G0281727	DDB_G0281727								cul_FB_up
DDB_G0281757	DDB_G0281757								cul_FB_up
DDB_G0281771	DDB_G0281771								cul_FB_up
DDB_G0282015	DDB_G0282015								cul_FB_up
DDB_G0282193	DDB_G0282193								cul_FB_up
DDB_G0282435	DDB_G0282435								cul_FB_up
DDB_G0282437	DDB_G0282437_ps								cul_FB_up
DDB_G0282439	DDB_G0282439								cul_FB_up
DDB_G0282443	DDB_G0282443								cul_FB_up
DDB_G0282455	DDB_G0282455								cul_FB_up
DDB_G0282461	grlC								cul_FB_up
DDB_G0282589	DDB_G0282589								cul_FB_up
DDB_G0282995	DDB_G0282995								cul_FB_up
DDB_G0283277	DDB_G0283277_ps								cul_FB_up
DDB_G0283947	DDB_G0283947								cul_FB_up
DDB_G0284207	DDB_G0284207								cul_FB_up
DDB_G0284209	DDB_G0284209								cul_FB_up
DDB_G0284239	DDB_G0284239								cul_FB_up
DDB_G0284295	iliG								cul_FB_up
DDB_G0284677	expl2								cul_FB_up
DDB_G0284801	DDB_G0284801								cul_FB_up
DDB_G0285053	alrB								cul_FB_up
DDB_G0285141	osbJ								cul_FB_up
DDB_G0285273	DDB_G0285273								cul_FB_up
DDB_G0285289	DDB_G0285289								cul_FB_up
DDB_G0285383	DDB_G0285383								cul_FB_up
DDB_G0285441	DDB_G0285441								cul_FB_up
DDB_G0285443	DDB_G0285443								cul_FB_up
DDB_G0285445	DDB_G0285445								cul_FB_up
DDB_G0285567	DDB_G0285567								cul_FB_up
DDB_G0285569	DDB_G0285569								cul_FB_up
DDB_G0285645	DDB_G0285645								cul_FB_up
DDB_G0285737	DDB_G0285737								cul_FB_up
DDB_G0286203	DDB_G0286203								cul_FB_up
DDB_G0286631	ponF								cul_FB_up
DDB_G0286635	DDB_G0286635								cul_FB_up
DDB_G0286675	DDB_G0286675								cul_FB_up
DDB_G0286815	DDB_G0286815_ps								cul_FB_up
DDB_G0286873	DDB_G0286873								cul_FB_up
DDB_G0286887	DDB_G0286887								cul_FB_up
DDB_G0286993	DDB_G0286993								cul_FB_up
DDB_G0287037	DDB_G0287037								cul_FB_up
DDB_G0287065	DDB_G0287065								cul_FB_up
DDB_G0287293	gerA								cul_FB_up
DDB_G0287501	DDB_G0287501								cul_FB_up
DDB_G0287549	DDB_G0287549								cul_FB_up
DDB_G0287561	DDB_G0287561								cul_FB_up
DDB_G0287563	mut								cul_FB_up
DDB_G0287583	gerC								cul_FB_up
DDB_G0287687	gerB								cul_FB_up
DDB_G0287795	gcvH4								cul_FB_up
DDB_G0288017	DDB_G0288017								cul_FB_up
DDB_G0288019	DDB_G0288019								cul_FB_up
DDB_G0288167	DDB_G0288167								cul_FB_up
DDB_G0288323	strM								cul_FB_up
DDB_G0288359	dcd3A								cul_FB_up
DDB_G0288397	DDB_G0288397								cul_FB_up
DDB_G0288443	DDB_G0288443								cul_FB_up
DDB_G0288489	DDB_G0288489								cul_FB_up
DDB_G0288521	DDB_G0288521								cul_FB_up
DDB_G0288817	osbK								cul_FB_up
DDB_G0288841	DDB_G0288841								cul_FB_up
DDB_G0288843	tmc_ps3								cul_FB_up
DDB_G0289065	DDB_G0289065								cul_FB_up
DDB_G0289095	DDB_G0289095								cul_FB_up
DDB_G0289245	DDB_G0289245								cul_FB_up
DDB_G0289359	DDB_G0289359								cul_FB_up
DDB_G0289527	DDB_G0289527								cul_FB_up
DDB_G0290023	gxcL								cul_FB_up
DDB_G0290025	DDB_G0290025								cul_FB_up
DDB_G0290419	DDB_G0290419								cul_FB_up
DDB_G0291189	DDB_G0291189								cul_FB_up
DDB_G0291396	DDB_G0291396								cul_FB_up
DDB_G0291448	cyp519D1								cul_FB_up
DDB_G0291588	ddx55								cul_FB_up
DDB_G0291812	DDB_G0291812								cul_FB_up
DDB_G0292210	DDB_G0292210								cul_FB_up
DDB_G0292254	DDB_G0292254								cul_FB_up
DDB_G0292462	DDB_G0292462								cul_FB_up
DDB_G0292598	DDB_G0292598								cul_FB_up
DDB_G0292822	DDB_G0292822								cul_FB_up
DDB_G0292824	DDB_G0292824								cul_FB_up
DDB_G0292826	DDB_G0292826								cul_FB_up
DDB_G0292984	ubqN								cul_FB_up
DDB_G0293060	DDB_G0293060								cul_FB_up
DDB_G0293422	DDB_G0293422								cul_FB_up
DDB_G0293650	fahd2								cul_FB_up
DDB_G0293806	DDB_G0293806								cul_FB_up
DDB_G0293890	DDB_G0293890								cul_FB_up
DDB_G0294473	staA								cul_FB_up
DDB_G0349505	nat7								cul_FB_up

## Sheet: Regulon clusters
Supplemental_File_S7: Milestones, Regulons and disaggregation gene lists
ddb_g	genename	Regulon Cluster
DDB_G0287891	bms1l	1
DDB_G0292216	bxdc1	1
DDB_G0287937	bxdc2	1
DDB_G0270156	DDB_G0270156	1
DDB_G0271272	DDB_G0271272	1
DDB_G0278331	DDB_G0278331	1
DDB_G0280797	DDB_G0280797	1
DDB_G0288551	DDB_G0288551	1
DDB_G0290031	DDB_G0290031	1
DDB_G0281711	ddx27	1
DDB_G0280147	ddx47	1
DDB_G0269878	fbl	1
DDB_G0284945	fsjC	1
DDB_G0287147	gnl3	1
DDB_G0270336	ipo4	1
DDB_G0276411	mrt4	1
DDB_G0285465	nog1	1
DDB_G0281685	nol1	1
DDB_G0285679	nol5a	1
DDB_G0279013	nola1	1
DDB_G0287537	nop14	1
DDB_G0282803	rcl1	1
DDB_G0293560	rpa2	1
DDB_G0274521	rrs1	1
DDB_G0269972	sas10	1
DDB_G0286399	tsfm	1
DDB_G0276283	utp13	1
DDB_G0275141	utp5	1
DDB_G0282623	wdr3	1
DDB_G0277019	wdr36	1
DDB_G0278345	acly	2
DDB_G0269038	atp5D	2
DDB_G0276241	atp5e	2
DDB_G0291358	cct2	2
DDB_G0281849	cct5	2
DDB_G0282485	cepB	2
DDB_G0283587	csn1	2
DDB_G0293844	csn4	2
DDB_G0284597	csn5	2
DDB_G0293180	csn6	2
DDB_G0289483	ctxA	2
DDB_G0276893	ctxB	2
DDB_G0280401	cypD	2
DDB_G0268360	DDB_G0268360	2
DDB_G0269050	DDB_G0269050	2
DDB_G0269740	DDB_G0269740	2
DDB_G0270070	DDB_G0270070	2
DDB_G0271030	DDB_G0271030_ps	2
DDB_G0272232	DDB_G0272232	2
DDB_G0272238	DDB_G0272238	2
DDB_G0274331	DDB_G0274331	2
DDB_G0274407	DDB_G0274407	2
DDB_G0275039	DDB_G0275039	2
DDB_G0276473	DDB_G0276473	2
DDB_G0276837	DDB_G0276837	2
DDB_G0277213	DDB_G0277213	2
DDB_G0278341	DDB_G0278341	2
DDB_G0278597	DDB_G0278597	2
DDB_G0279059	DDB_G0279059	2
DDB_G0280271	DDB_G0280271	2
DDB_G0281487	DDB_G0281487	2
DDB_G0283275	DDB_G0283275	2
DDB_G0285021	DDB_G0285021	2
DDB_G0285079	DDB_G0285079	2
DDB_G0288155	DDB_G0288155	2
DDB_G0289679	DDB_G0289679	2
DDB_G0290409	DDB_G0290409	2
DDB_G0290975	DDB_G0290975	2
DDB_G0291886	DDB_G0291886_ps	2
DDB_G0292610	DDB_G0292610	2
DDB_G0292882	DDB_G0292882	2
DDB_G0295691	DDB_G0295691	2
DDB_G0347202	DDB_G0347202	2
DDB_G0289317	drg1	2
DDB_G0293254	eif3F	2
DDB_G0288053	empA	2
DDB_G0293540	empB	2
DDB_G0278969	empC	2
DDB_G0275071	fahd1	2
DDB_G0292380	fhbB	2
DDB_G0278095	mecr	2
DDB_G0290997	mppA2	2
DDB_G0288983	mrpl3	2
DDB_G0291173	ndufv2	2
DDB_G0285537	ost3	2
DDB_G0278725	p17	2
DDB_G0287595	pgkA	2
DDB_G0284117	phbB	2
DDB_G0273191	rps30-1	2
DDB_G0274449	scsB	2
DDB_G0271842	scsC	2
DDB_G0284947	ucr	2
DDB_G0284473	vatC	2
DDB_G0275701	vatE	2
DDB_G0274553	vatH	2
DDB_G0291780	wbp1	2
DDB_G0291994	abcA1	3
DDB_G0291980	abcA9	3
DDB_G0288879	act11	3
DDB_G0276233	cct8	3
DDB_G0282097	cxfA	3
DDB_G0295473	DDB_G0295473	3
DDB_G0275045	gpbB	3
DDB_G0281795	nacB	3
DDB_G0279189	rpl11	3
DDB_G0288295	rpl12	3
DDB_G0291870	rpl13	3
DDB_G0275881	rpl13a	3
DDB_G0277975	rpl14	3
DDB_G0272893	rpl15-1	3
DDB_G0285277	rpl17	3
DDB_G0279997	rpl18	3
DDB_G0285881	rpl18a	3
DDB_G0281565	rpl19	3
DDB_G0279387	rpl21	3
DDB_G0290315	rpl23	3
DDB_G0293502	rpl23a	3
DDB_G0280229	rpl24	3
DDB_G0283741	rpl26	3
DDB_G0292388	rpl27a	3
DDB_G0282379	rpl28	3
DDB_G0291862	rpl3	3
DDB_G0270380	rpl30	3
DDB_G0279061	rpl31	3
DDB_G0271976	rpl32	3
DDB_G0286389	rpl34	3
DDB_G0288349	rpl35	3
DDB_G0270424	rpl35a	3
DDB_G0271668	rpl36	3
DDB_G0270984	rpl36a	3
DDB_G0285971	rpl37	3
DDB_G0281093	rpl37A	3
DDB_G0268302	rpl38	3
DDB_G0277803	rpl4	3
DDB_G0278539	rpl5	3
DDB_G0292460	rpl6	3
DDB_G0276441	rpl7	3
DDB_G0277629	rpl7a	3
DDB_G0274113	rpl8	3
DDB_G0278959	rpl9	3
DDB_G0277907	rplP1	3
DDB_G0287995	rplp1B	3
DDB_G0286117	rps10	3
DDB_G0282601	rps11	3
DDB_G0284533	rps13	3
DDB_G0284093	rps16	3
DDB_G0290141	rps17	3
DDB_G0276415	rps18	3
DDB_G0293700	rps21	3
DDB_G0272250	rps23	3
DDB_G0275473	rps24	3
DDB_G0271148	rps25	3
DDB_G0281677	rps26	3
DDB_G0285597	rps28	3
DDB_G0272308	rps29	3
DDB_G0277345	rps3a	3
DDB_G0272825	rps4	3
DDB_G0286075	rps5	3
DDB_G0280823	rps6	3
DDB_G0289025	rps7	3
DDB_G0291864	rps8	3
DDB_G0270316	rpsA	3
DDB_G0280755	ubqB	3
DDB_G0276765	ubqC	3
DDB_G0269518	abnB	4
DDB_G0269520	abnC	4
DDB_G0267374	acpA	4
DDB_G0272104	acpB	4
DDB_G0274727	act19	4
DDB_G0274285	act20	4
DDB_G0274561	act21	4
DDB_G0289005	act4	4
DDB_G0274135	act6	4
DDB_G0282813	arcB	4
DDB_G0292804	arcC	4
DDB_G0269102	arcD	4
DDB_G0291121	cinB	4
DDB_G0287483	cnrG	4
DDB_G0289815	cupB	4
DDB_G0289283	cupC	4
DDB_G0289813	cupF	4
DDB_G0289883	cupG	4
DDB_G0290563	cupH	4
DDB_G0275537	cytC	4
DDB_G0270214	DD7-1	4
DDB_G0267564	DDB_G0267564	4
DDB_G0268122	DDB_G0268122	4
DDB_G0270212	DDB_G0270212	4
DDB_G0270366	DDB_G0270366	4
DDB_G0270368	DDB_G0270368	4
DDB_G0270922	DDB_G0270922	4
DDB_G0274181	DDB_G0274181	4
DDB_G0275227	DDB_G0275227	4
DDB_G0280149	DDB_G0280149	4
DDB_G0281967	DDB_G0281967	4
DDB_G0288221	DDB_G0288221	4
DDB_G0288233	DDB_G0288233	4
DDB_G0290971	DDB_G0290971	4
DDB_G0291402	DDB_G0291402	4
DDB_G0292096	DDB_G0292096	4
DDB_G0292664	DDB_G0292664	4
DDB_G0293366	DDB_G0293366	4
DDB_G0295739	DDB_G0295739	4
DDB_G0295799	DDB_G0295799	4
DDB_G0295801	DDB_G0295801	4
DDB_G0267846	expl1	4
DDB_G0292378	fhbA	4
DDB_G0277855	fimA	4
DDB_G0276875	hspG5	4
DDB_G0276949	hspG6	4
DDB_G0276951	hspG7	4
DDB_G0277119	hspG8	4
DDB_G0276953	hspG9	4
DDB_G0268038	mtpn	4
DDB_G0286721	ponC3	4
DDB_G0286719	ponC4	4
DDB_G0286723	ponC5	4
DDB_G0302511	rpl39	4
DDB_G0268332	uduA1	4
DDB_G0269890	DDB_G0269890	5
DDB_G0278063	DDB_G0278063	5
DDB_G0291003	DDB_G0291003	5
DDB_G0273471	dpp3-1	5
DDB_G0279793	lap	5
DDB_G0270994	psaA	5
DDB_G0270670	psaB	5
DDB_G0282363	psmA1	5
DDB_G0292122	psmA2	5
DDB_G0267408	psmA3	5
DDB_G0280969	psmA4	5
DDB_G0268538	psmA5	5
DDB_G0278847	psmA6	5
DDB_G0272831	psmA7	5
DDB_G0272969	psmB1	5
DDB_G0269472	psmB2	5
DDB_G0269772	psmB3	5
DDB_G0273163	psmB4-1	5
DDB_G0293784	psmB5	5
DDB_G0267390	psmB6	5
DDB_G0283679	psmB7	5
DDB_G0270784	psmC1	5
DDB_G0276917	psmC2	5
DDB_G0284415	psmC3	5
DDB_G0289003	psmC4	5
DDB_G0292382	psmC5	5
DDB_G0284517	psmC6	5
DDB_G0281315	psmD11	5
DDB_G0281051	psmD12	5
DDB_G0285105	psmD13	5
DDB_G0272566	psmD14	5
DDB_G0293752	psmD2	5
DDB_G0288621	psmD3	5
DDB_G0270188	psmD6	5
DDB_G0279633	psmD7	5
DDB_G0272564	psmD8-1	5
DDB_G0271106	sod2	5
DDB_G0290851	spc3	5
DDB_G0280313	ssr2	5
DDB_G0285527	uch2	5
DDB_G0271264	usp14	5
DDB_G0287199	5NT	6
DDB_G0281545	acaA	6
DDB_G0287569	agl	6
DDB_G0285023	alrF	6
DDB_G0289555	arkA	6
DDB_G0277829	carC	6
DDB_G0276759	cbpA	6
DDB_G0283613	cbpC	6
DDB_G0283153	cbpD1	6
DDB_G0283083	cbpD2	6
DDB_G0274099	cbpE	6
DDB_G0283611	cbpF	6
DDB_G0272827	cbpI	6
DDB_G0288245	cigA	6
DDB_G0279799	cprB	6
DDB_G0272833	csbA	6
DDB_G0272562	csbB	6
DDB_G0267840	DDB_G0267840	6
DDB_G0271996	DDB_G0271996	6
DDB_G0272180	DDB_G0272180	6
DDB_G0272586	DDB_G0272586	6
DDB_G0274899	DDB_G0274899	6
DDB_G0277325	DDB_G0277325	6
DDB_G0278083	DDB_G0278083	6
DDB_G0279337	DDB_G0279337	6
DDB_G0279815	DDB_G0279815	6
DDB_G0280181	DDB_G0280181	6
DDB_G0280307	DDB_G0280307	6
DDB_G0280557	DDB_G0280557	6
DDB_G0280935	DDB_G0280935	6
DDB_G0281401	DDB_G0281401	6
DDB_G0282107	DDB_G0282107	6
DDB_G0282555	DDB_G0282555	6
DDB_G0283469	DDB_G0283469	6
DDB_G0283595	DDB_G0283595	6
DDB_G0283645	DDB_G0283645	6
DDB_G0284315	DDB_G0284315	6
DDB_G0284325	DDB_G0284325	6
DDB_G0284529	DDB_G0284529	6
DDB_G0284559	DDB_G0284559	6
DDB_G0285167	DDB_G0285167	6
DDB_G0285989	DDB_G0285989	6
DDB_G0286129	DDB_G0286129	6
DDB_G0289577	DDB_G0289577	6
DDB_G0290879	DDB_G0290879	6
DDB_G0291632	DDB_G0291632	6
DDB_G0292248	DDB_G0292248	6
DDB_G0293026	DDB_G0293026	6
DDB_G0293610	DDB_G0293610	6
DDB_G0293942	DDB_G0293942	6
DDB_G0294585	DDB_G0294585	6
DDB_G0295813	DDB_G0295813	6
DDB_G0289929	fmoD	6
DDB_G0289925	fmoG	6
DDB_G0288377	gxcH	6
DDB_G0283599	limA	6
DDB_G0271908	mrrA	6
DDB_G0287659	nagD	6
DDB_G0291998	naglu	6
DDB_G0280053	osbA	6
DDB_G0285845	phdA	6
DDB_G0291982	psiA	6
DDB_G0288919	psiI	6
DDB_G0292014	psiK	6
DDB_G0273097	ptpA1-1	6
DDB_G0282247	rapgapB	6
DDB_G0282069	slrA	6
DDB_G0280689	tgrB1	6
DDB_G0280531	tgrC1	6
DDB_G0283323	tgrH1	6
DDB_G0283335	tgrI1	6
DDB_G0275745	tgrR1	6
DDB_G0277627	tgrR2	6
DDB_G0290961	zfaA	6
DDB_G0292150	ak1	7
DDB_G0267638	DDB_G0267638	7
DDB_G0268102	DDB_G0268102	7
DDB_G0268650	DDB_G0268650	7
DDB_G0269710	DDB_G0269710	7
DDB_G0270170	DDB_G0270170	7
DDB_G0270388	DDB_G0270388	7
DDB_G0274915	DDB_G0274915	7
DDB_G0274995	DDB_G0274995	7
DDB_G0275005	DDB_G0275005	7
DDB_G0275533	DDB_G0275533	7
DDB_G0275875	DDB_G0275875	7
DDB_G0277787	DDB_G0277787	7
DDB_G0279165	DDB_G0279165	7
DDB_G0279309	DDB_G0279309	7
DDB_G0279425	DDB_G0279425	7
DDB_G0279863	DDB_G0279863	7
DDB_G0280131	DDB_G0280131	7
DDB_G0280177	DDB_G0280177	7
DDB_G0280491	DDB_G0280491	7
DDB_G0280817	DDB_G0280817	7
DDB_G0280957	DDB_G0280957	7
DDB_G0281045	DDB_G0281045	7
DDB_G0283759	DDB_G0283759	7
DDB_G0284049	DDB_G0284049	7
DDB_G0285063	DDB_G0285063	7
DDB_G0287221	DDB_G0287221	7
DDB_G0289705	DDB_G0289705	7
DDB_G0293596	DDB_G0293596	7
DDB_G0277075	detA	7
DDB_G0277845	dhkB	7
DDB_G0278971	dimA	7
DDB_G0270880	gflC	7
DDB_G0283907	pkaC	7
DDB_G0269610	gxcT	7
DDB_G0289319	mybQ	7
DDB_G0283385	splA	7
DDB_G0287505	talB	7
DDB_G0269194	trfA	7
DDB_G0276137	xrn1	7
DDB_G0289069	arrD	8
DDB_G0292696	colA	8
DDB_G0273045	cyp508A1-1	8
DDB_G0267566	DDB_G0267566	8
DDB_G0268486	DDB_G0268486_ps	8
DDB_G0269794	DDB_G0269794	8
DDB_G0270610	DDB_G0270610	8
DDB_G0279615	DDB_G0279615	8
DDB_G0281169	DDB_G0281169	8
DDB_G0284781	DDB_G0284781	8
DDB_G0287863	DDB_G0287863	8
DDB_G0289267	DDB_G0289267	8
DDB_G0291516	DDB_G0291516	8
DDB_G0293802	DDB_G0293802	8
DDB_G0293832	DDB_G0293832	8
DDB_G0267934	fnkB	8
DDB_G0272929	isg12	8
DDB_G0270688	mpl2	8
DDB_G0291666	tgrA2	8
DDB_G0291668	tgrA3	8
DDB_G0291514	tgrA4	8
DDB_G0268490	tgrO1	8
DDB_G0268284	tgrO4	8
DDB_G0269008	DDB_G0269008	9
DDB_G0269078	DDB_G0269078	9
DDB_G0272316	DDB_G0272316	9
DDB_G0273423	DDB_G0273423	9
DDB_G0275233	DDB_G0275233	9
DDB_G0278645	DDB_G0278645	9
DDB_G0286685	DDB_G0286685	9
DDB_G0272658	sigN1	9
DDB_G0271822	sigN11	9
DDB_G0271714	sigN12	9
DDB_G0271716	sigN14	9
DDB_G0273023	sigN2	9
DDB_G0272654	sigN25	9
DDB_G0272927	sigN3	9
DDB_G0272656	sigN4	9
DDB_G0273021	sigN5	9
DDB_G0271712	sigN6	9
DDB_G0271818	sigN7	9
DDB_G0271824	sigN8	9
DDB_G0271718	sigN9	9
DDB_G0280249	ase1A	10
DDB_G0279343	aurK	10
DDB_G0292676	bub1	10
DDB_G0285601	cdc20	10
DDB_G0267748	cdc45	10
DDB_G0285313	cepH	10
DDB_G0271286	clasp	10
DDB_G0267904	DDB_G0267904	10
DDB_G0269684	DDB_G0269684	10
DDB_G0277011	DDB_G0277011	10
DDB_G0279459	DDB_G0279459	10
DDB_G0283189	DDB_G0283189	10
DDB_G0283381	DDB_G0283381	10
DDB_G0283681	DDB_G0283681	10
DDB_G0287991	DDB_G0287991	10
DDB_G0267690	icpA	10
DDB_G0293198	kif10	10
DDB_G0288361	kif13	10
DDB_G0267396	kif2	10
DDB_G0285101	kif4	10
DDB_G0286623	mcm2	10
DDB_G0292958	mcm5	10
DDB_G0282933	mcm7	10
DDB_G0288819	ncapG2	10
DDB_G0291894	ncapH2	10
DDB_G0272368	ndm	10
DDB_G0270814	nek2	10
DDB_G0275929	pds5	10
DDB_G0274503	plk	10
DDB_G0282191	polA1	10
DDB_G0276977	rad21	10
DDB_G0269180	rcdP	10
DDB_G0291752	smc1	10
DDB_G0284499	smc2	10
DDB_G0276101	smc3	10
DDB_G0280045	thyA	10
DDB_G0288877	aarA	11
DDB_G0293010	aplD	11
DDB_G0279705	aplE	11
DDB_G0279713	aplK	11
DDB_G0273227	aslI-1	11
DDB_G0273305	aslJ-1	11
DDB_G0269116	cmbC	11
DDB_G0290365	ctdspl2	11
DDB_G0284613	D7	11
DDB_G0269566	DDB_G0269566	11
DDB_G0270154	DDB_G0270154	11
DDB_G0271372	DDB_G0271372	11
DDB_G0271700	DDB_G0271700	11
DDB_G0271828	DDB_G0271828	11
DDB_G0272975	DDB_G0272975	11
DDB_G0273081	DDB_G0273081	11
DDB_G0273145	DDB_G0273145	11
DDB_G0273195	DDB_G0273195	11
DDB_G0274289	DDB_G0274289	11
DDB_G0274533	DDB_G0274533	11
DDB_G0274617	DDB_G0274617	11
DDB_G0274641	DDB_G0274641	11
DDB_G0274675	DDB_G0274675	11
DDB_G0274735	DDB_G0274735	11
DDB_G0275411	DDB_G0275411	11
DDB_G0276215	DDB_G0276215	11
DDB_G0276693	DDB_G0276693	11
DDB_G0277457	DDB_G0277457	11
DDB_G0277567	DDB_G0277567	11
DDB_G0278213	DDB_G0278213	11
DDB_G0278671	DDB_G0278671	11
DDB_G0278911	DDB_G0278911	11
DDB_G0279051	DDB_G0279051	11
DDB_G0279719	DDB_G0279719	11
DDB_G0280601	DDB_G0280601	11
DDB_G0281025	DDB_G0281025	11
DDB_G0281173	DDB_G0281173	11
DDB_G0281485	DDB_G0281485	11
DDB_G0281917	DDB_G0281917	11
DDB_G0282715	DDB_G0282715	11
DDB_G0282947	DDB_G0282947	11
DDB_G0283373	DDB_G0283373	11
DDB_G0284025	DDB_G0284025	11
DDB_G0285781	DDB_G0285781	11
DDB_G0285941	DDB_G0285941	11
DDB_G0285959	DDB_G0285959	11
DDB_G0286025	DDB_G0286025	11
DDB_G0286243	DDB_G0286243	11
DDB_G0286381	DDB_G0286381	11
DDB_G0286589	DDB_G0286589	11
DDB_G0286943	DDB_G0286943	11
DDB_G0287317	DDB_G0287317	11
DDB_G0288805	DDB_G0288805	11
DDB_G0289043	DDB_G0289043	11
DDB_G0290153	DDB_G0290153	11
DDB_G0290283	DDB_G0290283	11
DDB_G0290675	DDB_G0290675	11
DDB_G0291171	DDB_G0291171	11
DDB_G0291938	DDB_G0291938	11
DDB_G0292968	DDB_G0292968	11
DDB_G0293826	DDB_G0293826	11
DDB_G0293924	DDB_G0293924	11
DDB_G0280943	elmoD	11
DDB_G0293182	expl8	11
DDB_G0270762	fimD	11
DDB_G0287295	forC	11
DDB_G0291123	glpD	11
DDB_G0269900	gnt10	11
DDB_G0288147	pkcA	11
DDB_G0279267	hdaD	11
DDB_G0285643	mrkB	11
DDB_G0284759	psiM	11
DDB_G0293288	psiQ	11
DDB_G0286119	tagB	11
DDB_G0286121	tagC	11
DDB_G0292562	tgrQ1	11
DDB_G0292436	triA	11
DDB_G0289655	abcG7	12
DDB_G0288179	carB	12
DDB_G0281507	colC	12
DDB_G0284983	colD	12
DDB_G0267764	DDB_G0267764	12
DDB_G0269672	DDB_G0269672	12
DDB_G0269674	DDB_G0269674	12
DDB_G0269702	DDB_G0269702	12
DDB_G0269882	DDB_G0269882	12
DDB_G0269886	DDB_G0269886	12
DDB_G0270342	DDB_G0270342	12
DDB_G0270582	DDB_G0270582	12
DDB_G0270788	DDB_G0270788	12
DDB_G0270890	DDB_G0270890	12
DDB_G0271074	DDB_G0271074	12
DDB_G0272042	DDB_G0272042	12
DDB_G0272420	DDB_G0272420	12
DDB_G0272530	DDB_G0272530	12
DDB_G0274173	DDB_G0274173	12
DDB_G0274261	DDB_G0274261	12
DDB_G0275063	DDB_G0275063	12
DDB_G0275423	DDB_G0275423	12
DDB_G0277187	DDB_G0277187	12
DDB_G0277317	DDB_G0277317	12
DDB_G0278697	DDB_G0278697	12
DDB_G0279119	DDB_G0279119	12
DDB_G0279431	DDB_G0279431	12
DDB_G0279455	DDB_G0279455	12
DDB_G0280559	DDB_G0280559	12
DDB_G0280859	DDB_G0280859	12
DDB_G0281083	DDB_G0281083	12
DDB_G0281295	DDB_G0281295	12
DDB_G0282179	DDB_G0282179	12
DDB_G0282865	DDB_G0282865	12
DDB_G0283691	DDB_G0283691	12
DDB_G0286865	DDB_G0286865	12
DDB_G0287837	DDB_G0287837	12
DDB_G0288419	DDB_G0288419	12
DDB_G0288515	DDB_G0288515	12
DDB_G0288745	DDB_G0288745	12
DDB_G0289209	DDB_G0289209	12
DDB_G0291818	DDB_G0291818	12
DDB_G0292202	DDB_G0292202	12
DDB_G0292476	DDB_G0292476	12
DDB_G0292520	DDB_G0292520	12
DDB_G0293440	DDB_G0293440	12
DDB_G0293638	DDB_G0293638	12
DDB_G0286647	ecmD	12
DDB_G0280199	gadA	12
DDB_G0289365	gghB	12
DDB_G0280627	gtaS	12
DDB_G0286607	fslP	12
DDB_G0281493	sodD	12
DDB_G0288711	tgrM1	12
DDB_G0287605	tgrP1	12
DDB_G0293666	tps8	12
DDB_G0269872	tspB	12
DDB_G0280847	2C	13
DDB_G0292168	cyp516A1	13
DDB_G0272556	cyp519C1	13
DDB_G0268174	DDB_G0268174	13
DDB_G0268400	DDB_G0268400	13
DDB_G0268458	DDB_G0268458	13
DDB_G0268656	DDB_G0268656	13
DDB_G0269360	DDB_G0269360	13
DDB_G0271994	DDB_G0271994	13
DDB_G0272672	DDB_G0272672	13
DDB_G0272714	DDB_G0272714	13
DDB_G0272716	DDB_G0272716	13
DDB_G0273367	DDB_G0273367	13
DDB_G0275481	DDB_G0275481	13
DDB_G0276165	DDB_G0276165	13
DDB_G0277233	DDB_G0277233	13
DDB_G0277739	DDB_G0277739	13
DDB_G0277741	DDB_G0277741	13
DDB_G0277795	DDB_G0277795	13
DDB_G0279617	DDB_G0279617	13
DDB_G0280717	DDB_G0280717	13
DDB_G0280871	DDB_G0280871	13
DDB_G0280873	DDB_G0280873	13
DDB_G0280999	DDB_G0280999	13
DDB_G0281001	DDB_G0281001	13
DDB_G0281189	DDB_G0281189	13
DDB_G0281191	DDB_G0281191	13
DDB_G0281195	DDB_G0281195	13
DDB_G0281197	DDB_G0281197	13
DDB_G0282315	DDB_G0282315	13
DDB_G0282317	DDB_G0282317	13
DDB_G0282319	DDB_G0282319	13
DDB_G0282321	DDB_G0282321	13
DDB_G0282323	DDB_G0282323	13
DDB_G0282935	DDB_G0282935	13
DDB_G0283421	DDB_G0283421	13
DDB_G0283493	DDB_G0283493	13
DDB_G0283501	DDB_G0283501	13
DDB_G0283503	DDB_G0283503	13
DDB_G0283505	DDB_G0283505	13
DDB_G0283507	DDB_G0283507	13
DDB_G0283509	DDB_G0283509	13
DDB_G0283513	DDB_G0283513	13
DDB_G0283515	DDB_G0283515	13
DDB_G0283517	DDB_G0283517	13
DDB_G0283519	DDB_G0283519	13
DDB_G0284283	DDB_G0284283	13
DDB_G0285355	DDB_G0285355	13
DDB_G0285697	DDB_G0285697	13
DDB_G0286193	DDB_G0286193	13
DDB_G0286467	DDB_G0286467	13
DDB_G0286667	DDB_G0286667	13
DDB_G0287719	DDB_G0287719	13
DDB_G0290847	DDB_G0290847	13
DDB_G0290855	DDB_G0290855	13
DDB_G0293356	DDB_G0293356	13
DDB_G0293676	DDB_G0293676	13
DDB_G0295719	DDB_G0295719	13
DDB_G0277853	ecmA	13
DDB_G0282811	gtaK	13
DDB_G0293360	hssA	13
DDB_G0293358	hssB	13
DDB_G0267412	pspA	13
DDB_G0284327	tmem184F	13
DDB_G0271318	DDB_G0271318	14
DDB_G0280925	DDB_G0280925	14
DDB_G0280927	DDB_G0280927	14
DDB_G0280929	DDB_G0280929	14
DDB_G0280931	DDB_G0280931	14
DDB_G0280933	DDB_G0280933	14
DDB_G0280949	DDB_G0280949	14
DDB_G0281003	DDB_G0281003	14
DDB_G0281005	DDB_G0281005	14
DDB_G0281007	DDB_G0281007	14
DDB_G0281011	DDB_G0281011	14
DDB_G0281013	DDB_G0281013	14
DDB_G0281015	DDB_G0281015	14
DDB_G0281017	DDB_G0281017	14
DDB_G0281019	DDB_G0281019	14
DDB_G0284287	DDB_G0284287	14
DDB_G0288911	DDB_G0288911	14
DDB_G0291291	ecmF	14
DDB_G0273091	zplC-1	14
DDB_G0281391	abcG5	15
DDB_G0281389	abcG6	15
DDB_G0270162	allB2	15
DDB_G0273229	aslK-1	15
DDB_G0275515	asnB	15
DDB_G0286411	bzpN	15
DDB_G0276941	cotA	15
DDB_G0276761	cotB	15
DDB_G0277141	cotC	15
DDB_G0283149	cotD	15
DDB_G0284465	cudA	15
DDB_G0269124	dcsA	15
DDB_G0268250	DDB_G0268250	15
DDB_G0268584	DDB_G0268584	15
DDB_G0268644	DDB_G0268644	15
DDB_G0269280	DDB_G0269280	15
DDB_G0269978	DDB_G0269978	15
DDB_G0270190	DDB_G0270190	15
DDB_G0271098	DDB_G0271098	15
DDB_G0273017	DDB_G0273017	15
DDB_G0273281	DDB_G0273281	15
DDB_G0274153	DDB_G0274153	15
DDB_G0274265	DDB_G0274265	15
DDB_G0274747	DDB_G0274747	15
DDB_G0274751	DDB_G0274751	15
DDB_G0275087	DDB_G0275087	15
DDB_G0275117	DDB_G0275117	15
DDB_G0275189	DDB_G0275189	15
DDB_G0275195	DDB_G0275195	15
DDB_G0275783	DDB_G0275783	15
DDB_G0275785	DDB_G0275785	15
DDB_G0277481	DDB_G0277481	15
DDB_G0278017	DDB_G0278017	15
DDB_G0278881	DDB_G0278881	15
DDB_G0280019	DDB_G0280019	15
DDB_G0280085	DDB_G0280085	15
DDB_G0280367	DDB_G0280367	15
DDB_G0281039	DDB_G0281039	15
DDB_G0281143	DDB_G0281143	15
DDB_G0281339	DDB_G0281339	15
DDB_G0281993	DDB_G0281993	15
DDB_G0283575	DDB_G0283575	15
DDB_G0284441	DDB_G0284441	15
DDB_G0285283	DDB_G0285283	15
DDB_G0285563	DDB_G0285563	15
DDB_G0285807	DDB_G0285807	15
DDB_G0285861	DDB_G0285861	15
DDB_G0285863	DDB_G0285863	15
DDB_G0286061	DDB_G0286061	15
DDB_G0286413	DDB_G0286413	15
DDB_G0286485	DDB_G0286485	15
DDB_G0286925	DDB_G0286925	15
DDB_G0287319	DDB_G0287319	15
DDB_G0287529	DDB_G0287529	15
DDB_G0287701	DDB_G0287701	15
DDB_G0288363	DDB_G0288363	15
DDB_G0288871	DDB_G0288871	15
DDB_G0288955	DDB_G0288955	15
DDB_G0289517	DDB_G0289517	15
DDB_G0289669	DDB_G0289669	15
DDB_G0289901	DDB_G0289901	15
DDB_G0289953	DDB_G0289953	15
DDB_G0290291	DDB_G0290291	15
DDB_G0291476	DDB_G0291476	15
DDB_G0292190	DDB_G0292190	15
DDB_G0292828	DDB_G0292828	15
DDB_G0293056	DDB_G0293056	15
DDB_G0268214	enoB	15
DDB_G0282245	forD	15
DDB_G0291378	forJ	15
DDB_G0270218	glkA	15
DDB_G0288975	hbx13	15
DDB_G0287231	manF	15
DDB_G0293886	omt11	15
DDB_G0290079	pgtB	15
DDB_G0278731	pgtD	15
DDB_G0287681	grlR	15
DDB_G0279483	pldB	15
DDB_G0286573	ponH	15
DDB_G0290245	psiC	15
DDB_G0290925	psiD	15
DDB_G0292912	psiN	15
DDB_G0293286	psiR	15
DDB_G0276939	pspB	15
DDB_G0277379	pspD	15
DDB_G0286499	pspG	15
DDB_G0276869	psvA	15
DDB_G0277871	rsc12	15
DDB_G0278389	rsmF	15
DDB_G0281467	tps5	15
DDB_G0280537	wacA	15
DDB_G0275437	7E	16
DDB_G0279795	adamts	16
DDB_G0267378	aqpA	16
DDB_G0267620	DDB_G0267620	16
DDB_G0269648	DDB_G0269648	16
DDB_G0270288	DDB_G0270288	16
DDB_G0270290	DDB_G0270290	16
DDB_G0270292	DDB_G0270292	16
DDB_G0270294	DDB_G0270294	16
DDB_G0270768	DDB_G0270768	16
DDB_G0272468	DDB_G0272468	16
DDB_G0273181	DDB_G0273181	16
DDB_G0273437	DDB_G0273437	16
DDB_G0274363	DDB_G0274363	16
DDB_G0274509	DDB_G0274509	16
DDB_G0274573	DDB_G0274573	16
DDB_G0275145	DDB_G0275145	16
DDB_G0275579	DDB_G0275579	16
DDB_G0275817	DDB_G0275817	16
DDB_G0275819	DDB_G0275819	16
DDB_G0278127	DDB_G0278127	16
DDB_G0278557	DDB_G0278557	16
DDB_G0278561	DDB_G0278561	16
DDB_G0278565	DDB_G0278565	16
DDB_G0278707	DDB_G0278707	16
DDB_G0279125	DDB_G0279125	16
DDB_G0279353	DDB_G0279353	16
DDB_G0279609	DDB_G0279609	16
DDB_G0279643	DDB_G0279643	16
DDB_G0279727	DDB_G0279727	16
DDB_G0280425	DDB_G0280425	16
DDB_G0280433	DDB_G0280433	16
DDB_G0281999	DDB_G0281999	16
DDB_G0282399	DDB_G0282399	16
DDB_G0282401	DDB_G0282401	16
DDB_G0283169	DDB_G0283169	16
DDB_G0283675	DDB_G0283675	16
DDB_G0283959	DDB_G0283959	16
DDB_G0283961	DDB_G0283961	16
DDB_G0284351	DDB_G0284351	16
DDB_G0284427	DDB_G0284427	16
DDB_G0284683	DDB_G0284683	16
DDB_G0284907	DDB_G0284907	16
DDB_G0284909	DDB_G0284909	16
DDB_G0285259	DDB_G0285259	16
DDB_G0286309	DDB_G0286309	16
DDB_G0286475	DDB_G0286475	16
DDB_G0286605	DDB_G0286605	16
DDB_G0288153	DDB_G0288153	16
DDB_G0290533	DDB_G0290533	16
DDB_G0290557	DDB_G0290557	16
DDB_G0290627	DDB_G0290627	16
DDB_G0291001	DDB_G0291001	16
DDB_G0291103	DDB_G0291103	16
DDB_G0292030	DDB_G0292030	16
DDB_G0292494	DDB_G0292494	16
DDB_G0293186	DDB_G0293186	16
DDB_G0293362	DDB_G0293362	16
DDB_G0293574	DDB_G0293574	16
DDB_G0292220	ecmH	16
DDB_G0292222	ecmI	16
DDB_G0274189	ecmJ	16
DDB_G0288331	expl7	16
DDB_G0292204	fscC	16
DDB_G0290845	gcvH2	16
DDB_G0269558	gnt11	16
DDB_G0285139	gtaL	16
DDB_G0281563	mybC	16
DDB_G0286905	pspE	16
DDB_G0276757	sigH	16
DDB_G0281387	srfA	16
DDB_G0292218	st15	16
DDB_G0277757	staD	16
DDB_G0291177	tspE	16
DDB_G0267964	DDB_G0267964	17
DDB_G0268028	DDB_G0268028	17
DDB_G0268248	DDB_G0268248	17
DDB_G0268750	DDB_G0268750	17
DDB_G0269390	DDB_G0269390	17
DDB_G0270236	DDB_G0270236	17
DDB_G0271972	DDB_G0271972	17
DDB_G0272218	DDB_G0272218	17
DDB_G0273273	DDB_G0273273	17
DDB_G0274157	DDB_G0274157	17
DDB_G0274615	DDB_G0274615	17
DDB_G0274883	DDB_G0274883	17
DDB_G0276393	DDB_G0276393	17
DDB_G0277581	DDB_G0277581	17
DDB_G0279035	DDB_G0279035	17
DDB_G0279361	DDB_G0279361	17
DDB_G0279987	DDB_G0279987	17
DDB_G0280215	DDB_G0280215	17
DDB_G0280357	DDB_G0280357	17
DDB_G0280415	DDB_G0280415	17
DDB_G0281155	DDB_G0281155	17
DDB_G0282605	DDB_G0282605	17
DDB_G0282883	DDB_G0282883	17
DDB_G0283135	DDB_G0283135	17
DDB_G0283585	DDB_G0283585	17
DDB_G0283837	DDB_G0283837	17
DDB_G0283935	DDB_G0283935	17
DDB_G0284077	DDB_G0284077	17
DDB_G0284303	DDB_G0284303	17
DDB_G0286023	DDB_G0286023	17
DDB_G0286053	DDB_G0286053	17
DDB_G0286055	DDB_G0286055	17
DDB_G0286285	DDB_G0286285	17
DDB_G0286577	DDB_G0286577	17
DDB_G0287417	DDB_G0287417	17
DDB_G0288211	DDB_G0288211	17
DDB_G0288371	DDB_G0288371	17
DDB_G0288389	DDB_G0288389	17
DDB_G0288513	DDB_G0288513	17
DDB_G0288781	DDB_G0288781	17
DDB_G0289363	DDB_G0289363	17
DDB_G0290041	DDB_G0290041	17
DDB_G0290151	DDB_G0290151	17
DDB_G0290309	DDB_G0290309	17
DDB_G0291392	DDB_G0291392	17
DDB_G0291712	DDB_G0291712	17
DDB_G0292054	DDB_G0292054	17
DDB_G0292834	DDB_G0292834	17
DDB_G0293268	DDB_G0293268	17
DDB_G0295745	DDB_G0295745	17
DDB_G0347550	DDB_G0347550	17
DDB_G0348639	DDB_G0348639	17
DDB_G0269132	ecmB	17
DDB_G0271660	fmoB	17
DDB_G0277275	poxA	17
DDB_G0267474	sigD	17
DDB_G0290071	sigG	17
DDB_G0267476	sigK	17
DDB_G0273261	sigL-1	17
DDB_G0289075	spiA	17
DDB_G0276469	syn16B	17
DDB_G0277903	cotE	18
DDB_G0271778	cyp516B1	18
DDB_G0269574	dcd3B	18
DDB_G0267710	DDB_G0267710	18
DDB_G0269634	DDB_G0269634	18
DDB_G0271850	DDB_G0271850	18
DDB_G0272570	DDB_G0272570	18
DDB_G0273357	DDB_G0273357	18
DDB_G0274433	DDB_G0274433	18
DDB_G0274801	DDB_G0274801	18
DDB_G0275463	DDB_G0275463	18
DDB_G0275489	DDB_G0275489	18
DDB_G0275685	DDB_G0275685	18
DDB_G0275903	DDB_G0275903	18
DDB_G0278745	DDB_G0278745	18
DDB_G0279023	DDB_G0279023	18
DDB_G0279651	DDB_G0279651	18
DDB_G0280561	DDB_G0280561	18
DDB_G0280915	DDB_G0280915	18
DDB_G0282109	DDB_G0282109	18
DDB_G0282441	DDB_G0282441	18
DDB_G0282589	DDB_G0282589	18
DDB_G0283277	DDB_G0283277_ps	18
DDB_G0285273	DDB_G0285273	18
DDB_G0286993	DDB_G0286993	18
DDB_G0287065	DDB_G0287065	18
DDB_G0287549	DDB_G0287549	18
DDB_G0288397	DDB_G0288397	18
DDB_G0288399	DDB_G0288399	18
DDB_G0289245	DDB_G0289245	18
DDB_G0292462	DDB_G0292462	18
DDB_G0292822	DDB_G0292822	18
DDB_G0293388	DDB_G0293388	18
DDB_G0295727	DDB_G0295727	18
DDB_G0347783	DDB_G0347783	18
DDB_G0276143	dhkF	18
DDB_G0284677	expl2	18
DDB_G0276937	expl5	18
DDB_G0287293	gerA	18
DDB_G0287583	gerC	18
DDB_G0271314	iliH	18
DDB_G0287121	nat4	18
DDB_G0284261	nxnB	18
DDB_G0287095	pks25	18
DDB_G0271520	pks5	18
DDB_G0288843	tmc_ps3	18
DDB_G0277497	aco	19
DDB_G0290271	cfr_ps1	19
DDB_G0294561	cyp514A2	19
DDB_G0268858	DDB_G0268858	19
DDB_G0269730	DDB_G0269730	19
DDB_G0270004	DDB_G0270004	19
DDB_G0271110	DDB_G0271110	19
DDB_G0271178	DDB_G0271178	19
DDB_G0271260	DDB_G0271260	19
DDB_G0271320	DDB_G0271320	19
DDB_G0271756	DDB_G0271756	19
DDB_G0271780	DDB_G0271780	19
DDB_G0272146	DDB_G0272146	19
DDB_G0273111	DDB_G0273111	19
DDB_G0273337	DDB_G0273337_ps	19
DDB_G0274299	DDB_G0274299	19
DDB_G0274343	DDB_G0274343	19
DDB_G0274451	DDB_G0274451	19
DDB_G0275253	DDB_G0275253	19
DDB_G0275491	DDB_G0275491	19
DDB_G0275949	DDB_G0275949	19
DDB_G0276245	DDB_G0276245	19
DDB_G0276687	DDB_G0276687	19
DDB_G0278537	DDB_G0278537	19
DDB_G0278553	DDB_G0278553	19
DDB_G0278559	DDB_G0278559	19
DDB_G0278695	DDB_G0278695	19
DDB_G0279541	DDB_G0279541	19
DDB_G0280189	DDB_G0280189	19
DDB_G0280277	DDB_G0280277	19
DDB_G0281233	DDB_G0281233	19
DDB_G0281757	DDB_G0281757	19
DDB_G0282015	DDB_G0282015	19
DDB_G0282305	DDB_G0282305	19
DDB_G0285441	DDB_G0285441	19
DDB_G0285443	DDB_G0285443	19
DDB_G0285567	DDB_G0285567	19
DDB_G0285569	DDB_G0285569	19
DDB_G0285737	DDB_G0285737	19
DDB_G0286675	DDB_G0286675	19
DDB_G0286815	DDB_G0286815_ps	19
DDB_G0287501	DDB_G0287501	19
DDB_G0288167	DDB_G0288167	19
DDB_G0288841	DDB_G0288841	19
DDB_G0289065	DDB_G0289065	19
DDB_G0289359	DDB_G0289359	19
DDB_G0289861	DDB_G0289861	19
DDB_G0291348	DDB_G0291348	19
DDB_G0293262	DDB_G0293262	19
DDB_G0293422	DDB_G0293422	19
DDB_G0293890	DDB_G0293890	19
DDB_G0280245	ecmL	19
DDB_G0270756	gtaG	19
DDB_G0277215	iptA	19
DDB_G0273479	nfyC-1	19
DDB_G0294473	staA	19
DDB_G0271196	staC	19
DDB_G0292908	ubqO	19
DDB_G0275687	abcG18	20
DDB_G0273213	aslA-1	20
DDB_G0273211	aslD-1	20
DDB_G0279529	bzpF	20
DDB_G0287087	cyp513B1	20
DDB_G0268756	DDB_G0268756	20
DDB_G0269082	DDB_G0269082	20
DDB_G0270710	DDB_G0270710	20
DDB_G0270722	DDB_G0270722	20
DDB_G0271326	DDB_G0271326	20
DDB_G0271354	DDB_G0271354	20
DDB_G0271588	DDB_G0271588	20
DDB_G0271930	DDB_G0271930	20
DDB_G0272298	DDB_G0272298	20
DDB_G0272464	DDB_G0272464	20
DDB_G0272500	DDB_G0272500	20
DDB_G0274539	DDB_G0274539	20
DDB_G0275807	DDB_G0275807	20
DDB_G0276063	DDB_G0276063	20
DDB_G0276075	DDB_G0276075	20
DDB_G0278421	DDB_G0278421	20
DDB_G0278519	DDB_G0278519	20
DDB_G0278823	DDB_G0278823	20
DDB_G0279757	DDB_G0279757	20
DDB_G0280217	DDB_G0280217	20
DDB_G0280769	DDB_G0280769	20
DDB_G0281513	DDB_G0281513	20
DDB_G0281771	DDB_G0281771	20
DDB_G0282021	DDB_G0282021	20
DDB_G0282037	DDB_G0282037	20
DDB_G0282039	DDB_G0282039	20
DDB_G0282127	DDB_G0282127	20
DDB_G0283077	DDB_G0283077	20
DDB_G0286203	DDB_G0286203	20
DDB_G0286873	DDB_G0286873	20
DDB_G0287089	DDB_G0287089	20
DDB_G0287091	DDB_G0287091	20
DDB_G0287093	DDB_G0287093	20
DDB_G0288185	DDB_G0288185	20
DDB_G0288231	DDB_G0288231	20
DDB_G0289095	DDB_G0289095	20
DDB_G0290419	DDB_G0290419	20
DDB_G0291169	DDB_G0291169	20
DDB_G0292824	DDB_G0292824	20
DDB_G0292826	DDB_G0292826	20
DDB_G0293854	DDB_G0293854	20
DDB_G0293998	DDB_G0293998	20
DDB_G0268740	lip2	20
DDB_G0281895	mrkC	20
DDB_G0269940	osbC	20
DDB_G0290317	psiJ	20
DDB_G0292816	racL	20
DDB_G0269428	tps1	20
DDB_G0278279	tps9	20
DDB_G0269108	catB	21
DDB_G0270594	DDB_G0270594	21
DDB_G0271840	DDB_G0271840	21
DDB_G0271990	DDB_G0271990	21
DDB_G0273155	DDB_G0273155	21
DDB_G0274317	DDB_G0274317	21
DDB_G0274335	DDB_G0274335	21
DDB_G0274337	DDB_G0274337	21
DDB_G0275083	DDB_G0275083	21
DDB_G0275433	DDB_G0275433	21
DDB_G0275571	DDB_G0275571	21
DDB_G0276521	DDB_G0276521	21
DDB_G0278399	DDB_G0278399	21
DDB_G0278423	DDB_G0278423	21
DDB_G0278437	DDB_G0278437	21
DDB_G0278439	DDB_G0278439	21
DDB_G0280337	DDB_G0280337	21
DDB_G0282013	DDB_G0282013	21
DDB_G0282439	DDB_G0282439	21
DDB_G0282443	DDB_G0282443	21
DDB_G0282667	DDB_G0282667	21
DDB_G0283007	DDB_G0283007	21
DDB_G0284207	DDB_G0284207	21
DDB_G0284239	DDB_G0284239	21
DDB_G0285289	DDB_G0285289	21
DDB_G0285645	DDB_G0285645	21
DDB_G0287037	DDB_G0287037	21
DDB_G0287561	DDB_G0287561	21
DDB_G0288303	DDB_G0288303	21
DDB_G0288369	DDB_G0288369	21
DDB_G0288489	DDB_G0288489	21
DDB_G0288829	DDB_G0288829	21
DDB_G0289493	DDB_G0289493	21
DDB_G0289527	DDB_G0289527	21
DDB_G0292254	DDB_G0292254	21
DDB_G0293060	DDB_G0293060	21
DDB_G0293442	DDB_G0293442	21
DDB_G0293806	DDB_G0293806	21
DDB_G0270406	eIF4e3	21
DDB_G0287687	gerB	21
DDB_G0292426	pitD	21
DDB_G0269254	sigJ	21
DDB_G0286563	sigM	21
DDB_G0288323	strM	21
DDB_G0272811	wasB	21

## Sheet: Disaggregation genes
Supplemental_File_S7: Milestones, Regulons and disaggregation gene lists
ddb_g	genename	tgr_disagg_gene
DDB_G0270826	abcG22	6to8h
DDB_G0280545	act7	6to8h
DDB_G0288523	agpB	6to8h
DDB_G0291157	cln3	6to8h
DDB_G0289815	cupB	6to8h
DDB_G0290563	cupH	6to8h
DDB_G0273047	cyp508A3-1	6to8h
DDB_G0287087	cyp513B1	6to8h
DDB_G0284647	cyp517A2	6to8h
DDB_G0268142	DDB_G0268142	6to8h
DDB_G0268180	DDB_G0268180	6to8h
DDB_G0270134	DDB_G0270134	6to8h
DDB_G0270310	DDB_G0270310	6to8h
DDB_G0270774	DDB_G0270774	6to8h
DDB_G0271904	DDB_G0271904	6to8h
DDB_G0272947	DDB_G0272947	6to8h
DDB_G0273143	DDB_G0273143	6to8h
DDB_G0273277	DDB_G0273277	6to8h
DDB_G0273449	DDB_G0273449	6to8h
DDB_G0274369	DDB_G0274369	6to8h
DDB_G0274479	DDB_G0274479	6to8h
DDB_G0274585	DDB_G0274585	6to8h
DDB_G0276697	DDB_G0276697	6to8h
DDB_G0277687	DDB_G0277687	6to8h
DDB_G0278577	DDB_G0278577	6to8h
DDB_G0279815	DDB_G0279815	6to8h
DDB_G0280141	DDB_G0280141	6to8h
DDB_G0281049	DDB_G0281049	6to8h
DDB_G0281997	DDB_G0281997	6to8h
DDB_G0282807	DDB_G0282807_ps	6to8h
DDB_G0283549	DDB_G0283549	6to8h
DDB_G0283791	DDB_G0283791	6to8h
DDB_G0283887	DDB_G0283887	6to8h
DDB_G0286649	DDB_G0286649	6to8h
DDB_G0287085	DDB_G0287085	6to8h
DDB_G0287399	DDB_G0287399	6to8h
DDB_G0287677	DDB_G0287677	6to8h
DDB_G0288095	DDB_G0288095	6to8h
DDB_G0288219	DDB_G0288219	6to8h
DDB_G0289347	DDB_G0289347	6to8h
DDB_G0289551	DDB_G0289551	6to8h
DDB_G0290177	DDB_G0290177	6to8h
DDB_G0290657	DDB_G0290657	6to8h
DDB_G0291029	DDB_G0291029	6to8h
DDB_G0291045	DDB_G0291045	6to8h
DDB_G0292094	DDB_G0292094	6to8h
DDB_G0292288	DDB_G0292288	6to8h
DDB_G0293116	DDB_G0293116	6to8h
DDB_G0293354	DDB_G0293354	6to8h
DDB_G0295799	DDB_G0295799	6to8h
DDB_G0295801	DDB_G0295801	6to8h
DDB_G0306979	DDB_G0306979	6to8h
DDB_G0349321	DDB_G0349321	6to8h
DDB_G0272002	egeA	6to8h
DDB_G0267548	elmoF	6to8h
DDB_G0289779	fmoA	6to8h
DDB_G0277915	gefI	6to8h
DDB_G0280319	glud2	6to8h
DDB_G0282475	gxcF	6to8h
DDB_G0293928	gxcZ	6to8h
DDB_G0284295	iliG	6to8h
DDB_G0270006	jcdI	6to8h
DDB_G0287507	limD1	6to8h
DDB_G0277917	mlcD	6to8h
DDB_G0288679	myoE	6to8h
DDB_G0289447	myoH	6to8h
DDB_G0269160	nxnA	6to8h
DDB_G0280353	odhA	6to8h
DDB_G0277863	pdiA	6to8h
DDB_G0271916	rtoA	6to8h
DDB_G0292814	symA	6to8h
DDB_G0290055	uap1	6to8h
DDB_G0275637	abcF3	8to12h
DDB_G0292924	adcA	8to12h
DDB_G0287891	bms1l	8to12h
DDB_G0292216	bxdc1	8to12h
DDB_G0287937	bxdc2	8to12h
DDB_G0285829	bxdc5	8to12h
DDB_G0288565	bysl	8to12h
DDB_G0293462	cirh1a	8to12h
DDB_G0284791	cpnC	8to12h
DDB_G0279797	ctnB	8to12h
DDB_G0280567	ctps	8to12h
DDB_G0267500	DDB_G0267500	8to12h
DDB_G0267572	DDB_G0267572	8to12h
DDB_G0267670	DDB_G0267670	8to12h
DDB_G0268696	DDB_G0268696	8to12h
DDB_G0268762	DDB_G0268762	8to12h
DDB_G0268824	DDB_G0268824	8to12h
DDB_G0269344	DDB_G0269344	8to12h
DDB_G0269722	DDB_G0269722	8to12h
DDB_G0269860	DDB_G0269860	8to12h
DDB_G0270050	DDB_G0270050	8to12h
DDB_G0270156	DDB_G0270156	8to12h
DDB_G0270496	DDB_G0270496	8to12h
DDB_G0270642	DDB_G0270642	8to12h
DDB_G0270828	DDB_G0270828	8to12h
DDB_G0270848	DDB_G0270848_ps	8to12h
DDB_G0270850	DDB_G0270850	8to12h
DDB_G0270958	DDB_G0270958	8to12h
DDB_G0271272	DDB_G0271272	8to12h
DDB_G0271638	DDB_G0271638	8to12h
DDB_G0271724	DDB_G0271724	8to12h
DDB_G0272030	DDB_G0272030	8to12h
DDB_G0272364	DDB_G0272364	8to12h
DDB_G0272492	DDB_G0272492	8to12h
DDB_G0272785	DDB_G0272785	8to12h
DDB_G0273087	DDB_G0273087_ps	8to12h
DDB_G0273307	DDB_G0273307_ps	8to12h
DDB_G0274505	DDB_G0274505	8to12h
DDB_G0275027	DDB_G0275027	8to12h
DDB_G0275403	DDB_G0275403	8to12h
DDB_G0275459	DDB_G0275459	8to12h
DDB_G0275509	DDB_G0275509	8to12h
DDB_G0275553	DDB_G0275553	8to12h
DDB_G0275885	DDB_G0275885	8to12h
DDB_G0275919	DDB_G0275919	8to12h
DDB_G0276121	DDB_G0276121	8to12h
DDB_G0276255	DDB_G0276255	8to12h
DDB_G0276627	DDB_G0276627	8to12h
DDB_G0276815	DDB_G0276815	8to12h
DDB_G0277023	DDB_G0277023	8to12h
DDB_G0277265	DDB_G0277265	8to12h
DDB_G0277337	DDB_G0277337	8to12h
DDB_G0278331	DDB_G0278331	8to12h
DDB_G0278337	DDB_G0278337	8to12h
DDB_G0278635	DDB_G0278635	8to12h
DDB_G0278919	DDB_G0278919	8to12h
DDB_G0278925	DDB_G0278925	8to12h
DDB_G0279205	DDB_G0279205	8to12h
DDB_G0279237	DDB_G0279237	8to12h
DDB_G0279259	DDB_G0279259	8to12h
DDB_G0279321	DDB_G0279321	8to12h
DDB_G0279325	DDB_G0279325	8to12h
DDB_G0279821	DDB_G0279821	8to12h
DDB_G0280067	DDB_G0280067	8to12h
DDB_G0280105	DDB_G0280105	8to12h
DDB_G0280257	DDB_G0280257	8to12h
DDB_G0280463	DDB_G0280463	8to12h
DDB_G0280487	DDB_G0280487	8to12h
DDB_G0280797	DDB_G0280797	8to12h
DDB_G0281079	DDB_G0281079	8to12h
DDB_G0281763	DDB_G0281763	8to12h
DDB_G0281839	DDB_G0281839	8to12h
DDB_G0282171	DDB_G0282171	8to12h
DDB_G0282965	DDB_G0282965	8to12h
DDB_G0284119	DDB_G0284119	8to12h
DDB_G0284383	DDB_G0284383	8to12h
DDB_G0284625	DDB_G0284625	8to12h
DDB_G0284817	DDB_G0284817	8to12h
DDB_G0285045	DDB_G0285045	8to12h
DDB_G0285467	DDB_G0285467	8to12h
DDB_G0285543	DDB_G0285543	8to12h
DDB_G0285709	DDB_G0285709	8to12h
DDB_G0285875	DDB_G0285875	8to12h
DDB_G0286673	DDB_G0286673	8to12h
DDB_G0286677	DDB_G0286677	8to12h
DDB_G0286941	DDB_G0286941	8to12h
DDB_G0287097	DDB_G0287097	8to12h
DDB_G0287889	DDB_G0287889	8to12h
DDB_G0288551	DDB_G0288551	8to12h
DDB_G0288625	DDB_G0288625	8to12h
DDB_G0289235	DDB_G0289235	8to12h
DDB_G0289415	DDB_G0289415	8to12h
DDB_G0290029	DDB_G0290029	8to12h
DDB_G0290031	DDB_G0290031	8to12h
DDB_G0290059	DDB_G0290059_ps	8to12h
DDB_G0290181	DDB_G0290181	8to12h
DDB_G0290425	DDB_G0290425	8to12h
DDB_G0290555	DDB_G0290555	8to12h
DDB_G0290815	DDB_G0290815	8to12h
DDB_G0290837	DDB_G0290837	8to12h
DDB_G0290967	DDB_G0290967	8to12h
DDB_G0291013	DDB_G0291013	8to12h
DDB_G0291444	DDB_G0291444	8to12h
DDB_G0291492	DDB_G0291492	8to12h
DDB_G0292096	DDB_G0292096	8to12h
DDB_G0292108	DDB_G0292108	8to12h
DDB_G0292138	DDB_G0292138	8to12h
DDB_G0292146	DDB_G0292146	8to12h
DDB_G0292158	DDB_G0292158	8to12h
DDB_G0292468	DDB_G0292468	8to12h
DDB_G0292636	DDB_G0292636	8to12h
DDB_G0293064	DDB_G0293064	8to12h
DDB_G0293118	DDB_G0293118	8to12h
DDB_G0293412	DDB_G0293412	8to12h
DDB_G0293460	DDB_G0293460	8to12h
DDB_G0293614	DDB_G0293614	8to12h
DDB_G0293622	DDB_G0293622	8to12h
DDB_G0293730	DDB_G0293730	8to12h
DDB_G0294553	DDB_G0294553	8to12h
DDB_G0294629	DDB_G0294629	8to12h
DDB_G0302676	DDB_G0302676	8to12h
DDB_G0348940	DDB_G0348940	8to12h
DDB_G0282741	ddx18	8to12h
DDB_G0281841	ddx24	8to12h
DDB_G0281711	ddx27	8to12h
DDB_G0271708	ddx31	8to12h
DDB_G0280147	ddx47	8to12h
DDB_G0270396	ddx49	8to12h
DDB_G0274325	ddx52	8to12h
DDB_G0280407	ddx56	8to12h
DDB_G0278965	DG2033	8to12h
DDB_G0280843	dgk	8to12h
DDB_G0270110	dhx33	8to12h
DDB_G0287351	dhx37	8to12h
DDB_G0283789	dimt1l	8to12h
DDB_G0272634	dohh-1	8to12h
DDB_G0272732	emg1	8to12h
DDB_G0281211	far1	8to12h
DDB_G0269878	fbl	8to12h
DDB_G0284945	fsjC	8to12h
DDB_G0284761	fslA	8to12h
DDB_G0270482	gfm1	8to12h
DDB_G0286015	gmsA	8to12h
DDB_G0287147	gnl3	8to12h
DDB_G0285425	gpaD	8to12h
DDB_G0271684	grlA	8to12h
DDB_G0271686	grlB	8to12h
DDB_G0286895	grlD	8to12h
DDB_G0282175	grlF	8to12h
DDB_G0282459	grlH	8to12h
DDB_G0291566	grwd1	8to12h
DDB_G0302418	imp4	8to12h
DDB_G0270336	ipo4	8to12h
DDB_G0287513	jcdG	8to12h
DDB_G0287035	lmpB	8to12h
DDB_G0269642	mak16l	8to12h
DDB_G0280127	map1d	8to12h
DDB_G0295765	mdn1	8to12h
DDB_G0282489	mhkD	8to12h
DDB_G0284663	mrd1	8to12h
DDB_G0276411	mrt4	8to12h
DDB_G0268868	nat10	8to12h
DDB_G0282243	nhp2l1	8to12h
DDB_G0295477	nip7	8to12h
DDB_G0295761	nle1	8to12h
DDB_G0271306	nmd3	8to12h
DDB_G0285465	nog1	8to12h
DDB_G0281685	nol1	8to12h
DDB_G0292466	nol10	8to12h
DDB_G0285679	nol5a	8to12h
DDB_G0291438	nol6	8to12h
DDB_G0279013	nola1	8to12h
DDB_G0289699	nola2	8to12h
DDB_G0281933	nola4	8to12h
DDB_G0287537	nop14	8to12h
DDB_G0282181	nvl	8to12h
DDB_G0285141	osbJ	8to12h
DDB_G0277455	plbE	8to12h
DDB_G0288649	ponL	8to12h
DDB_G0285515	ppan	8to12h
DDB_G0291556	prmt1	8to12h
DDB_G0287775	ptcC	8to12h
DDB_G0273037	ptcJ-1	8to12h
DDB_G0271632	pus7	8to12h
DDB_G0275073	pwp1	8to12h
DDB_G0284621	pwp2	8to12h
DDB_G0276335	pyr1-3	8to12h
DDB_G0270340	rapC	8to12h
DDB_G0282803	rcl1	8to12h
DDB_G0293904	redA	8to12h
DDB_G0272789	rlp24	8to12h
DDB_G0275759	rpa1	8to12h
DDB_G0278263	rpa12	8to12h
DDB_G0293560	rpa2	8to12h
DDB_G0267416	rpmA	8to12h
DDB_G0274521	rrs1	8to12h
DDB_G0269972	sas10	8to12h
DDB_G0269688	sdad1	8to12h
DDB_G0268630	spsA	8to12h
DDB_G0289253	tmcC	8to12h
DDB_G0283969	trmt11	8to12h
DDB_G0286399	tsfm	8to12h
DDB_G0293372	ttc27	8to12h
DDB_G0270230	utp11	8to12h
DDB_G0276283	utp13	8to12h
DDB_G0279371	utp14	8to12h
DDB_G0283581	utp15	8to12h
DDB_G0271240	utp18	8to12h
DDB_G0279083	utp20	8to12h
DDB_G0275141	utp5	8to12h
DDB_G0282371	veg111	8to12h
DDB_G0279903	wdr12	8to12h
DDB_G0288659	wdr18	8to12h
DDB_G0282623	wdr3	8to12h
DDB_G0277019	wdr36	8to12h
DDB_G0280489	wdr46	8to12h
DDB_G0268898	wdr75	8to12h
DDB_G0283635	wdr89	8to12h
